# Supplementary material for: A signal capture and proofreading mechanism for the KDEL-receptor explains selectivity and dynamic range in ER retrieval
Source: eLife journal article supplement (doi:10.7554/elife.68380), 2021-06-17

Figure 1 Supplement 1d. Source data

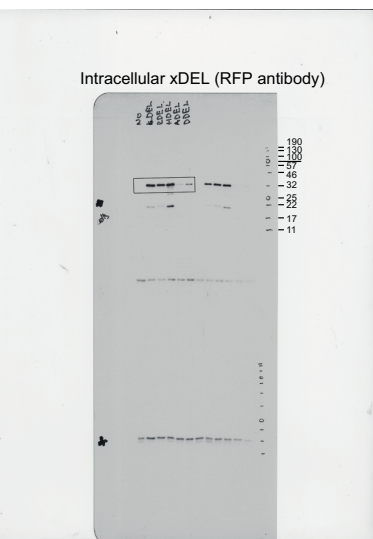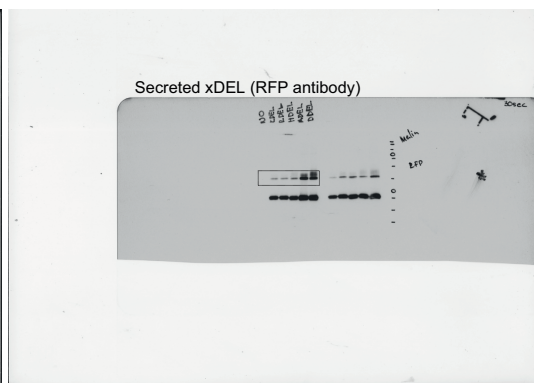

76

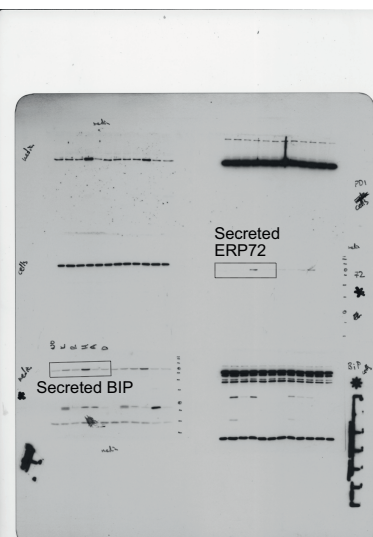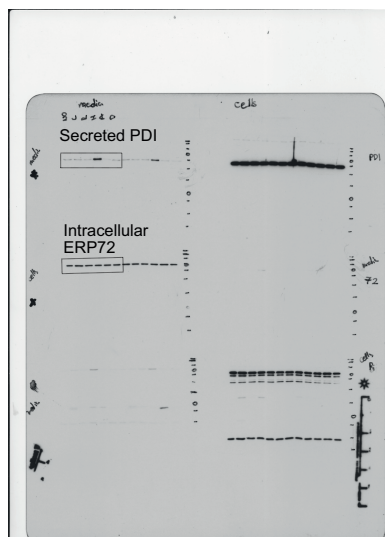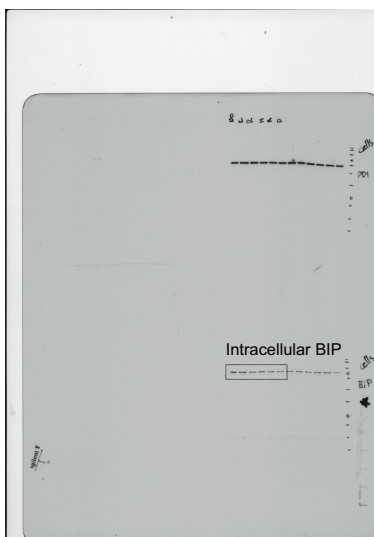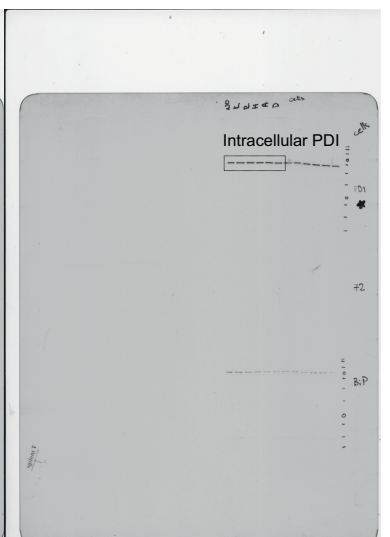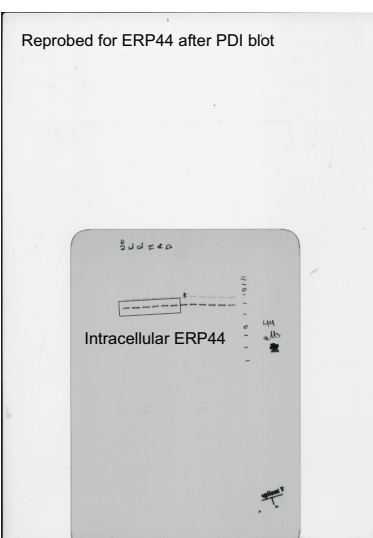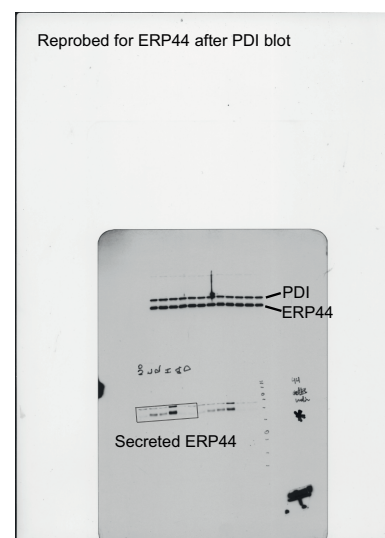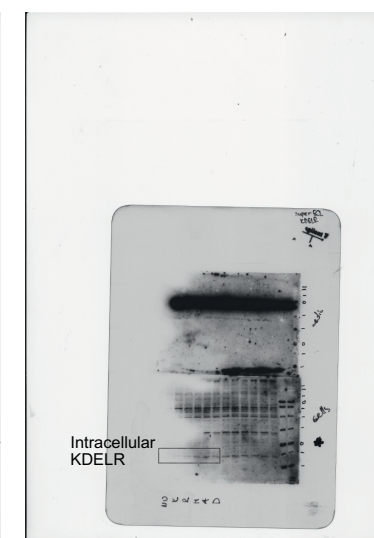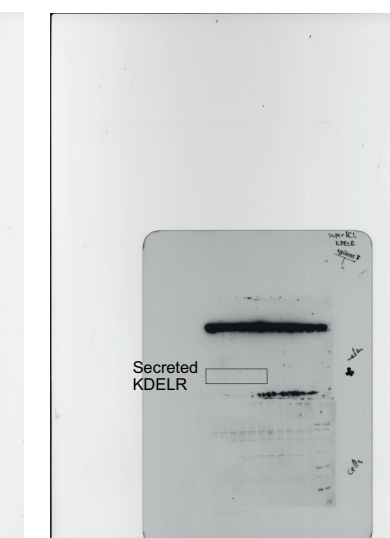

Supplement: fig1-figsupp1-data2 [file elife-68380-fig1-figsupp1-data2-v4.pdf]
