# Supplementary material for: A signal capture and proofreading mechanism for the KDEL-receptor explains selectivity and dynamic range in ER retrieval
Source: eLife. 2021 Jun 17;10:e68380. doi: 10.7554/eLife.68380 (PMC8248988; doi:10.7554/eLife.68380)
Supplement: Figure 1—figure supplement 1—source data 1. [file elife-68380-fig1-figsupp1-data1.xlsx]

## Sheet: Sheet1
Figure 1 - Supplement 1a
	HeLa			Brain Mouse
	Mean	SD	N	Mean	SD	N
BIP	8619.76	1317.31	6	5746.09		4
PDIA1	7883.61	379.33	6	5598.15		4
CALR	7864.83	584.8	6	8552.81		4
CALR3						4
DJC10	94.08	11.8	6	83.44		4
EDEM3	6.76	2.59	6	0.04		4
ENPL	6673.91	378.71	6	4051.29		4
ENPLL						4
P3H1	174.38	15.11	6	1.15		4
P3H2	98.24	18.11	6			4
PDIA6	2089.95	241.89	6	3740.18		4
PLGT2	90.52	7.74	6	51.7		4
TXND5	2021.21	325.03		494.17		4
PLGT3	63.92	8.6	6	1.6		4
SERPH	5007.25	352.14	6	3118.87		4
PIMT	1500.46	192.92	6	979.01		4
GT253	4.33	1.18	6			4
GT252			6			4
ERP44	520.31	24.28	6	680.52		4
GT251	310.59	46.04	6	18.46		4
GLU2B	2431.51	275.82	6	1214.36		4
FKBP7	32.23	5.58	6			4
RCN2	592.39	54.34	6	1203.15		4
EOGT	18.01	2.42	6	9.27		4
FKBP9	182.76	15.63	6	43.41		4
RCN1	2481.38	56.04	6	643.03		4
CNPY2	1909.39	255.53	6	1276.18		4
FKB14	65.33	12.88	6			4
UGGG2	10.32	1.85	6	0.08		4
RCN3	296.07	53.97	6	112.64		4
SDF2L	501.56	148.2	6	198.07		4
PDIA4	2407.47	109.23	6	2715.3		4
PDIA2						4
PDIA3	5314.27	480.8	6	8562.6		4
Figure 1 - Supplement 1c
	HeLa			Brain Mouse
	Mean	SD	N	Mean	SD	N
KDELR1	10.92	20.11	6	43.5		4
KDELR2	204.22	70.5	6	43.5		4
KDELR3	2.59	0.85	6
Source data:
https://elifesciences.org/articles/16950
https://www.cell.com/cell-reports/fulltext/S2211-1247(17)31188-9?_returnURL=https%3A%2F%2Flinkinghub.elsevier.com%2Fretrieve%2Fpii%2FS2211124717311889%3Fshowall%3Dtrue
