# Supplementary material for: A signal capture and proofreading mechanism for the KDEL-receptor explains selectivity and dynamic range in ER retrieval
Source: eLife. 2021 Jun 17;10:e68380. doi: 10.7554/eLife.68380 (PMC8248988; doi:10.7554/eLife.68380)
Supplement: Figure 1—figure supplement 1—source data 3. [file elife-68380-fig1-figsupp1-data3.xlsx]

## Sheet: Sheet1
Figure 1 - Supplement 1e									Figure 1 - Supplement 1f
	mScarlet									BiP	PDI	erp72	erp44
-Ligand	2.51666								-Ligand	0	0	0	7.83845
	2.69286				mScarlet					1.53979	4.75279	2.03325	0.968338				BIP	PDI	ERP72	ERP44
	1.97406		Mean	No Ligand	1.79589					0	8.15473	0	0		Mean	No Ligand	0.384948	4.30251	0.508311	2.2017
	0			KDEL	0.994695					0	0	0	0			KDEL	12.6757	2.09711	1.34849	26.8613
Mean	1.79589			RDEL	0.822378				Mean	0.384948	4.30251	0.508311	2.2017			RDEL	7.97397	4.88293	2.52966	26.5173
SEM	0.617861			HDEL	7.30075				SEM	0.384948	2.36481	0.508311	1.89273			HDEL	35.9609	39.9565	27.9089	61.9681
+KDEL	0.37599			ADEL	51.5524				+KDEL	5.26909	2.76744	2.76744	45.9418			ADEL	8.48715	6.64938	4.17684	11.7908
	0.389082			DDEL	66.1313					0.598685	0.934976	0.275804	36.0054			DDEL	10.6505	7.07013	2.6919	5.06877
	0.390354									10.1547	2.58892	1.17537	15.7489
	2.82335				mScarlet					34.6804	0	1.17537	9.74894				BIP	PDI	ERP72	ERP44
Mean	0.994695		SEM	No Ligand	0.617861				Mean	12.6757	2.09711	1.34849	26.8613		SEM	No Ligand	0.384948	2.36481	0.508311	1.89273
SEM	0.609561			KDEL	0.609561				SEM	7.58988	0.58335	0.518333	8.48527			KDEL	7.58988	0.58335	0.518333	8.48527
+RDEL	0.235936			RDEL	0.516324				+RDEL	8.3838	2.66091	2.66091	45.198			RDEL	3.9485	1.2755	0.301023	14.0713
	0.482236			HDEL	3.18259					3.22786	7.07916	1.65067	55.9763			HDEL	10.9901	6.16033	8.21193	8.87526
	0.210916			ADEL	17.6447					1.33893	4.90871	2.80873	1.94734			ADEL	7.38202	0.692993	3.16553	3.13508
	2.36042			DDEL	14.4069					18.9453	0	2.99832	2.94734			DDEL	4.2687	2.09611	0.891199	1.81703
Mean	0.822378								Mean	7.97397	4.88293	2.52966	26.5173
SEM	0.516324								SEM	3.9485	1.2755	0.301023	14.0713
+HDEL	12.8507								+HDEL	59.9352	52.1552	52.1552	81.7379
	0.983317									7.33933	32.3597	15.8785	72.1869
	12.7114									33.5603	35.3545	20.8007	46.5781
	2.65756									43.0086	0	22.8013	47.3694
Mean	7.30075								Mean	35.9609	39.9565	27.9089	61.9681
SEM	3.18259								SEM	10.9901	6.16033	8.21193	8.87526
+ADEL	33.9077								+ADEL	15.8692	7.34237	7.34237	8.6557
	69.1971									1.10513	5.95638	1.01131	14.9259
Mean	51.5524								Mean	8.48715	6.64938	4.17684	11.7908
SEM	17.6447								SEM	7.38202	0.692993	3.16553	3.13508
+DDEL	80.5415								+DDEL	17.6704	4.86003	4.86003	5.47655
	22.912									0.223031	5.09011	0.629864	10.0266
	80.2451									7.11776	11.2603	2.10387	1.89695
	80.8267									17.591	0	3.17385	2.87498
Mean	66.1313								Mean	10.6505	7.07013	2.6919	5.06877
SEM	14.4069								SEM	4.2687	2.09611	0.891199	1.81703
