# Supplementary material for: A signal capture and proofreading mechanism for the KDEL-receptor explains selectivity and dynamic range in ER retrieval
Source: eLife. 2021 Jun 17;10:e68380. doi: 10.7554/eLife.68380 (PMC8248988; doi:10.7554/eLife.68380)
Supplement: Figure 1—figure supplement 2—source data 1. [file elife-68380-fig1-figsupp2-data1.xlsx]

## Sheet: Sheet1
Figure 1 - Supplement 2
KDELR1 No ligand	KDELR1 +KDEL	KDELR1 +RDEL	KDELR1 +HDEL	KDELR1 +ADEL	KDELR1 +DDEL		KDELR2 No ligand	KDELR2 +KDEL	KDELR2 +RDEL	KDELR2 +HDEL	KDELR2 +ADEL	KDELR2 +DDEL
0.359599	0.206442	0.301766	0.214755	0.160745	0.296597		0.295067	0.18448	0.127862	0.259813	0.224557	0.283693
0.377456	0.188957	0.335183	0.197133	0.315574	0.338526		0.263241	0.230621	0.108828	0.215656	0.109468	0.168109
0.226739	0.203678	0.204382	0.208909	0.334789	0.393735		0.230064	0.156009	0.175244	0.288379	0.236517	0.212964
0.226386	0.0982989	0.165269	0.186066	0.162157	0.341887		0.206242	0.179973	0.158787	0.151886	0.248079	0.371111
0.131847	0.142366	0.19988	0.240478	0.174048	0.516031		0.160772	0.132189	0.245179	0.267777	0.172053	0.170906
0.22847	0.243693	0.25677	0.14079	0.234378	0.669059		0.248107	0.132428	0.191226	0.181211	0.230409	0.142173
0.480834	0.166264	0.139823	0.156428	0.217946	0.369214		0.253562	0.140022	0.291486	0.177433	0.304738	0.137548
0.249374	0.191049	0.15895	0.171218	0.148046	0.410146		0.160205	0.135822	0.254949	0.134695	0.194572	0.223946
0.137972	0.248248	0.222286	0.213947	0.182577	0.299605		0.23898	0.101532	0.159701	0.134404	0.238428	0.117919
0.388112	0.0522899	0.0708242	0.198029	0.16327	0.363637		0.303826	0.155109	0.0755805	0.142626	0.251607	0.151293
0.44822	0.262646	0.28421	0.166689	0.0897214	0.170877		0.267163	0.144203	0.190717	0.102815	0.206455	0.182378
0.334128	0.171266	0.227526	0.204884	0.281245	0.290974		0.252598	0.244688	0.281833	0.207246	0.240637	0.163339
0.273261	0.205778	0.184198	0.157004	0.150624	0.384496		0.29247	0.138937	0.164247	0.120371	0.368214	0.165796
0.12804	0.189996	0.167161	0.250767	0.196437	0.388409		0.290259	0.144203	0.159877	0.176583	0.34778	0.122976
0.30514	0.190321	0.147608	0.151523	0.217898	0.317863		0.247015	0.138937	0.144168	0.210301	0.288149	0.131416
0.283793	0.197343	0.160141	0.146	0.288933	0.365365		0.259633	0.101414	0.234383	0.189001	0.264829	0.195006
0.24614	0.114827	0.202373	0.230104	0.291093	0.229045		0.313346	0.184163	0.208554	0.162233	0.267246	0.219519
0.172242	0.0897587	0.313894	0.100144	0.361017	0.309393		0.246388	0.242725	0.266139	0.185411	0.225878	0.208304
0.219318	0.148402	0.23268	0.11527	0.220571	0.224561		0.290701	0.144777	0.227088	0.200641	0.239532	0.289442
0.424322	0.165732	0.0975339	0.128264	0.219879	0.239572		0.271923	0.296782	0.148657	0.142405	0.174416	0.356697
0.35088	0.154254	0.124824	0.168706	0.301055	0.388433		0.289755	0.222588	0.192244	0.12435	0.212133	0.24409
0.382872	0.0900715	0.195749	0.149498	0.465215	0.215897		0.420344	0.242725	0.252279	0.118915	0.200266	0.180835
0.375216	0.227618	0.124869	0.217895	0.163387	0.298097		0.308782	0.144777	0.0992677	0.234532	0.162091	0.207884
0.326382	0.100099	0.103608	0.20194	0.378944	0.335916		0.240756	0.222588	0.124721	0.27467	0.189308	0.229749
0.374489	0.198734	0.165733	0.097135	0.1676	0.207324		0.335251	0.284326	0.135634	0.156333	0.24702	0.290599
0.254177	0.132585	0.169404	0.110514	0.349695	0.184681		0.233293	0.241668	0.155079	0.211119	0.144268	0.253744
0.391362	0.154818	0.165195	0.139637	0.250145	0.300612		0.297849	0.146127	0.109157	0.188322	0.213043	0.220322
0.334244	0.201052	0.237964	0.249004	0.222828	0.276058		0.193654	0.137818	0.155468	0.154793	0.166485	0.211014
0.371196	0.192319	0.196062	0.140188	0.216946	0.28985		0.217575	0.173311	0.243175	0.153261	0.223868	0.169961
0.271188	0.130532	0.130342	0.0887246	0.196219	0.22578		0.382511	0.187872	0.0980898	0.231162	0.229185	0.0812657
0.372371	0.145888			0.223799	0.132128		0.272162	0.133146	0.165734	0.21737	0.144518	0.321097
0.376739	0.273276			0.440886	0.303408		0.252719	0.211357		0.142119	0.275246	0.219658
0.183359	0.175936			0.115603	0.126937		0.196623	0.21321		0.271101	0.277769	0.278177
0.351486	0.162324			0.27159	0.14399			0.227797		0.118292	0.198589	0.227588
0.326586				0.202585	0.329928			0.171523		0.121194	0.22187	0.183425
0.396429				0.196303	0.209565			0.162092		0.184706	0.238707	0.279913
0.257024				0.267905	0.206844			0.19541		0.264572	0.235619	0.131327
0.349467				0.26096				0.141136		0.125358	0.149149	0.139358
0.359241				0.26672						0.213406	0.221732	0.204702
0.449183										0.227447	0.195246	0.325889
0.352298										0.200479	0.233742	0.314188
0.276395											0.234638	0.305626
											0.163514	0.16865
											0.193886	0.1759
											0.234461	0.252954
											0.266191	0.26992
											0.315242
											0.280237
