# Supplementary material for: A signal capture and proofreading mechanism for the KDEL-receptor explains selectivity and dynamic range in ER retrieval
Source: eLife. 2021 Jun 17;10:e68380. doi: 10.7554/eLife.68380 (PMC8248988; doi:10.7554/eLife.68380)
Supplement: Figure 1—source data 1. [file elife-68380-fig1-data1.xlsx]

## Sheet: Sheet1
Figure 1e
Mock	KDEL	RDEL	HDEL	ADEL	DDEL
0.466584	0.136041	0.201466	0.109616	0.222863	0.256709
0.507646	0.27381	0.0809394	0.131769	0.212554	0.399241
0.427245	0.149968	0.10258	0.0907968	0.204216	0.263761
0.360048	0.182787	0.185302	0.0738666	0.289032	0.264426
0.358326	0.106388	0.108656	0.174762	0.178944	0.237561
0.310906	0.153675	0.149351	0.134714	0.299593	0.300203
0.271512	0.10132	0.169667	0.133239	0.357605	0.241869
0.517075	0.288196	0.131974	0.150959	0.460219	0.327261
0.284926	0.159487	0.101808	0.146615	0.317186	0.200311
0.313702	0.129131	0.139954	0.0852078	0.431089	0.246937
0.372744	0.086825	0.116993	0.10227	0.320526	0.322548
0.295886	0.174543	0.176866	0.211124	0.287607	0.225606
0.274312	0.1687	0.129249	0.0596286	0.183041	0.263187
0.356823	0.196893	0.138033	0.0949455	0.199602	0.318447
0.339232	0.26388	0.175177	0.131811	0.270531	0.262518
0.237568	0.249566	0.0827169	0.163434	0.282017	0.190522
0.234873	0.0749624	0.209781	0.113424	0.273468	0.264773
0.209492	0.119289	0.153441	0.109138	0.196786	0.386729
0.290959	0.077	0.153924	0.155695	0.349733	0.376087
0.220141	0.133908	0.181289	0.128077	0.250061	0.2356
0.263961	0.0972274	0.160086	0.159089	0.281354	0.56666
0.241686	0.0971417	0.167754	0.116453	0.245984	0.217374
0.162868	0.150813	0.216022	0.126419	0.209145	0.217
0.228265	0.0883417	0.13112	0.134587	0.277497	0.210276
0.23991	0.120512	0.325856	0.166792	0.231658	0.292868
0.17243	0.112052	0.0849469	0.124932	0.246601	0.495955
0.260425	0.0954147	0.0939326	0.154394	0.340004	0.423555
0.213082	0.103638	0.16823	0.1546	0.252598	0.216109
0.252429	0.208662	0.161218	0.123238	0.247411	0.340118
0.172234	0.110345	0.242432	0.0970122	0.179193	0.340799
0.282666	0.0794637	0.125975	0.129083	0.302059	0.301173
0.290017	0.0995863	0.142019	0.0826778	0.211442	0.176582
0.33051	0.15	0.136041	0.0902341	0.322887	0.1252
0.208139	0.170709	0.0877192	0.178339	0.285394	0.266453
0.514604	0.124968	0.116877	0.138243	0.431692	0.371338
0.333288	0.151125	0.0989349	0.12313	0.263394	0.228797
0.25489	0.111489	0.250829	0.0943367	0.176136	0.389106
0.236405	0.14738	0.12767	0.0858709	0.391113	0.186946
0.315422	0.11	0.150805	0.109082	0.388826	0.448693
0.547473	0.171437	0.0442746	0.12967	0.406208	0.285444
0.432763	0.133082	0.146099	0.10513	0.157146	0.279674
0.341672	0.0854721	0.126994	0.150838	0.144726	0.221598
0.324235	0.10831	0.0965498	0.0771573	0.18123	0.568834
0.293248	0.160898	0.0892684	0.0861168	0.302858
0.245609	0.16	0.170365	0.137255	0.315962
0.426694	0.0875335	0.15515	0.0923828	0.206494
0.26548	0.120658	0.141512	0.113502	0.225366
0.229654	0.140826	0.17943	0.0981204	0.125995
0.60303	0.0763412	0.180225	0.072919	0.295779
0.661868	0.0540316	0.0960065	0.0555265	0.27967
0.288513	0.19	0.152567	0.068269	0.249197
0.254009	0.152022	0.118753	0.092002	0.305654
0.279362	0.125689	0.187915	0.133206	0.335793
0.336554	0.110912	0.118323	0.181504	0.215834
0.337837	0.08	0.141144	0.139736	0.192983
0.484292	0.125512	0.208915	0.163893	0.318796
0.227254	0.109338	0.145243	0.103142	0.34066
0.209073	0.11	0.176369	0.130801	0.482354
0.231728	0.105656	0.136793	0.123636	0.205984
0.417036	0.0929687	0.125851	0.125003	0.288302
0.528428		0.202023	0.126283	0.303919
0.329778		0.241685	0.108154
0.319152		0.132868	0.157299
0.254553		0.197982	0.133533
0.306387		0.174689	0.0833112
0.291688		0.144272	0.0692816
0.278208		0.211995	0.107029
0.463906		0.243666	0.12146
0.385198		0.141815	0.18712
0.341064		0.159378	0.150253
0.458083		0.165323	0.12828
0.358021			0.0817069
0.301962			0.140608
0.326489			0.176351
0.295384			0.128255
0.301976			0.142589
0.344984			0.118349
0.187628			0.211949
0.269427
0.288228
0.380287
0.378261
0.236975
0.271245
0.316439
0.373195
0.305026
0.44042
0.286569
0.453081
0.291639
0.34225
0.267107
