# Supplementary material for: A signal capture and proofreading mechanism for the KDEL-receptor explains selectivity and dynamic range in ER retrieval
Source: eLife. 2021 Jun 17;10:e68380. doi: 10.7554/eLife.68380 (PMC8248988; doi:10.7554/eLife.68380)
Supplement: Figure 3—figure supplement 1—source data 1. [file elife-68380-fig3-figsupp1-data1.xlsx]

## Sheet: Sheet1
Figure 3c
Figure 3 - Supplement 1
WT –Ligand	WT +KDEL	WT +RDEL	WT +HDEL	E117Q –Ligand	E117Q +KDEL	E117Q +RDEL	E117Q +HDEL	E117D –Ligand	E117D +KDEL	E117D +RDEL	E117D +HDEL	E117A –Ligand	E117A +KDEL	E117A +RDEL	E117A +HDEL	W120F –Ligand	W120F +KDEL	W120F +RDEL	W120F +HDEL	W120A –Ligand	W120A +KDEL	W120A +RDEL	W120A +HDEL	E117AW120A –Ligand	E117AW120A +ΚDEL	E117AW120A +RDEL	E117AW120A +HDEL
0.284408	0.256053	0.0666165	0.134388	0.628451	0.139498	0.122648	0.0776672	0.289832	0.118486	0.158654	0.0817861	0.502888	0.20116	0.1375	0.152626	0.370146	0.52616	0.299472	0.446429	0.378	0.211	0.404	0.145	0.28009	0.300091	0.609559	0.296552
0.21616	0.211182	0.100558	0.130836	0.256613	0.205687	0.219218	0.0681595	0.219942	0.0850196	0.258245	0.174012	0.198341	0.0836147	0.114444	0.135814	0.332527	0.251642	0.317651	0.249985	0.337	0.262	0.317	0.283	0.237277	0.356887	0.534752	0.316119
0.247949	0.25195	0.127914	0.166948	0.292909	0.134818	0.0716061	0.110396	0.359121	0.164413	0.133776	0.124995	0.317415	0.0845213	0.0583577	0.0922907	0.41554	0.371402	0.336711	0.134489	0.309	0.265	0.359	0.27	0.274083	0.213197	0.521859	0.422416
0.192156	0.199022	0.107036	0.182055	0.257326	0.0920987	0.0447072	0.0933971	0.214547	0.113013	0.156787	0.173998	0.471439	0.103291	0.0742253	0.143486	0.344216	0.426674	0.367572	0.0894213	0.278	0.35	0.447	0.082	0.295681	0.406	0.422834	0.290879
0.293855	0.136514	0.151593	0.126504	0.30167	0.18972	0.110795	0.0685498	0.251242	0.0986251	0.0852981	0.0742717	0.406672	0.0922966	0.0997538	0.104773	0.317134	0.212558	0.372497	0.245331	0.205	0.283	0.335	0.151	0.110161	0.259505	0.533935	0.339442
0.156521	0.235575	0.112253	0.0632985	0.364571	0.149223	0.111812	0.126763	0.211641	0.224979	0.129686	0.0779756	0.322648	0.116603	0.109412	0.202411	0.407196	0.265974	0.318447	0.212316	0.243	0.179	0.218	0.221	0.239139	0.412803	0.244101	0.351679
0.339002	0.249037	0.237467	0.11683	0.342242	0.142037	0.142096	0.0661002	0.239048	0.116542	0.138637	0.077224	0.361631	0.169009	0.194296	0.313466	0.44208	0.461309	0.241282	0.165603	0.28	0.193	0.442	0.238	0.206189	0.348282	0.399697	0.387504
0.368559	0.236238	0.119619	0.164311	0.45206	0.203057	0.166658	0.0810802	0.44854	0.235764	0.142952	0.106028	0.389668	0.173743	0.0928952	0.205704	0.378669	0.25323	0.303636	0.235391	0.353	0.277	0.328	0.188	0.364832	0.241983	0.300289	0.487644
0.494764	0.234163	0.0838714	0.113142	0.212276	0.167581	0.0704732	0.053374	0.282816	0.0757315	0.10383	0.112618	0.350883	0.126611	0.0915615	0.136705	0.393066	0.245794	0.344135	0.129182	0.35	0.303	0.446	0.188	0.189877	0.276895	0.323896	0.359882
0.430059	0.128518	0.211408	0.0996263	0.296125	0.142015	0.0802198	0.0843854	0.310723	0.157218	0.24541	0.0748641	0.28247	0.253075	0.085146	0.0807763	0.270943	0.334621	0.347432	0.290994	0.28	0.518	0.377	0.345	0.283048	0.256046	0.341721	0.425424
0.240863	0.158642	0.108575	0.089004	0.195945	0.239247	0.0765456	0.0479029	0.261967	0.195855	0.0964987	0.0932587	0.400404	0.262321	0.118145	0.172693	0.484332	0.312317	0.235489	0.304182	0.41	0.312	0.606	0.309	0.460236	0.267282	0.276602	0.438545
0.393289	0.0830641	0.186859	0.107763	0.346851	0.154642	0.0715458	0.0768579	0.21046	0.13099	0.12455	0.138781	0.265818	0.208783	0.121789	0.0409357	0.322116	0.242927	0.276511	0.337361	0.216	0.394	0.576	0.286	0.36758	0.362272	0.24927	0.385598
0.257173	0.171207	0.14928	0.0743349	0.377622	0.280596	0.122319	0.0781142	0.248612	0.13763	0.293999	0.101245	0.472394	0.183863	0.0864627	0.177012	0.391627	0.405223	0.381112	0.224319	0.184	0.45	0.3	0.315	0.478565	0.187251	0.308914	0.380478
0.229677	0.151977	0.15591	0.135188	0.17258	0.148519	0.0657022	0.137219	0.40489	0.092505	0.0920592	0.112745	0.398279	0.119695	0.132022	0.118576	0.346317	0.528206	0.369282	0.323652	0.233	0.529	0.377	0.226	0.266078	0.342191	0.23215	0.263286
0.308448	0.0893792	0.191789	0.0852312	0.306612	0.188581	0.187362	0.0852895	0.428951	0.117232	0.116829	0.149059	0.373018	0.0814831	0.0592429	0.112651	0.351635	0.365574	0.323011	0.346739	0.395	0.458	0.324	0.241	0.238693	0.125625	0.35716	0.343095
0.21875	0.193814	0.0826822	0.151176	0.247568	0.0808278	0.0569457	0.100401	0.233842	0.176984	0.0998557	0.117608	0.538904	0.116985	0.117617	0.126964	0.431824	0.356055	0.466469	0.160489	0.294	0.358	0.422	0.272	0.299793	0.360738	0.338198	0.283895
0.352919	0.165986	0.119147	0.123856	0.390417	0.0551336	0.109198	0.0774163	0.435481	0.176169	0.142401	0.028041	0.28772	0.0865947	0.08628	0.176336	0.313982	0.407748	0.214146	0.315715	0.348	0.417	0.278	0.229	0.251359	0.539083	0.235506	0.509006
0.326748	0.0971785	0.217574	0.107256	0.0903759	0.172031	0.109543	0.067647	0.232518	0.0827834	0.120534	0.11118	0.345501	0.101098	0.297306	0.20985	0.409057	0.275548	0.195825	0.360663	0.421	0.342	0.34	0.212	0.315079	0.414679	0.339611	0.366811
0.238002	0.168899	0.149954	0.0601635	0.41434	0.161076	0.0463615	0.0475815	0.269672	0.0535344	0.0816641	0.14403	0.354701	0.163775	0.144166	0.158079	0.394613	0.328476	0.541629	0.149939	0.248	0.332	0.314	0.122	0.309084	0.303875	0.378614	0.360642
0.403163	0.144654	0.173545	0.156577	0.229177	0.164525	0.171448	0.0845193	0.279667	0.0779411	0.151913	0.0984147	0.166839	0.360106	0.0626719	0.108012	0.332628	0.218532	0.570852	0.31168	0.175	0.361	0.268	0.2	0.178163	0.388301	0.427214	0.173581
0.339555	0.150039	0.209179	0.140653	0.296463	0.157505	0.0512454	0.129467	0.217514	0.103871	0.157485	0.126968	0.372124	0.141113	0.0887331	0.120044	0.238384	0.326616	0.543346	0.195071	0.377	0.443	0.338	0.245	0.411533	0.552993	0.406361	0.405568
0.309965	0.202021	0.136202	0.132247	0.426997	0.0761925	0.0382791	0.146089	0.266436	0.150128	0.0995808	0.0884965	0.35642	0.0879871	0.276496	0.244049	0.406342	0.360543	0.273394	0.202096	0.417	0.215	0.411	0.157	0.216535	0.2466	0.330431	0.258821
0.318587	0.167665	0.266276	0.0854344	0.337566	0.160488	0.0374483	0.273542	0.385291	0.152879	0.0881738	0.0987817	0.4513	0.117275	0.223035	0.150367	0.266149	0.419982	0.424166	0.303502	0.344	0.185	0.33	0.302	0.147803	0.22859	0.470832	0.310248
0.28423	0.260196	0.196748	0.128195	0.312661	0.0953742	0.109049	0.285487	0.313767	0.106967	0.103883	0.0722621	0.466592	0.126916	0.126541	0.133833	0.263199	0.267223	0.619073	0.185303	0.318	0.332	0.398	0.191	0.153362	0.177138	0.474293	0.212634
0.282322	0.309362	0.144427	0.171315	0.250327	0.0994152	0.157068	0.139898	0.277215	0.162683	0.156102	0.0770573	0.463407	0.249106	0.123734	0.122821	0.405137	0.348395	0.455926	0.0910384	0.165	0.374	0.366	0.219	0.318837	0.170376	0.302965	0.168527
0.405112	0.123734	0.15741	0.130144	0.438528	0.237216	0.101669	0.177004	0.420288	0.124619	0.0891779	0.0888408	0.362993	0.144717	0.285618	0.161907	0.426963	0.154788	0.241058	0.0667702	0.301		0.361	0.318	0.186682	0.217151	0.399045	0.421999
0.343726	0.175714	0.129936	0.208227	0.343705	0.137413	0.107747	0.129482	0.292819	0.081476	0.153148	0.0582867	0.485487	0.0933314	0.245471		0.405918	0.231785		0.284075	0.302		0.477	0.257	0.199931	0.256782	0.247909	0.343567
0.486	0.0853815	0.0820666	0.139	0.334754	0.144318	0.0687643	0.132935	0.27465		0.215106	0.221027		0.0812558			0.309918	0.389334		0.154713	0.387		0.214	0.346	0.247641	0.261695	0.395351	0.233091
0.272568	0.152006	0.148807	0.146	0.303214	0.181874	0.0745676	0.13393	0.289169		0.348775	0.0657152		0.147744			0.37939	0.193089		0.294991	0.255		0.24	0.502	0.157366	0.217373	0.329855	0.331824
0.336234	0.131452	0.171771	0.147	0.428266	0.231629	0.11779	0.117222	0.194408		0.0851877	0.118777		0.148049			0.700639	0.430198		0.359057	0.326		0.288	0.264	0.169644	0.276633	0.453809	0.353501
0.239756	0.139039	0.0811561	0.136	0.385426	0.244304	0.361405	0.164339	0.318914		0.220777	0.0455654		0.240825			0.394589	0.328981		0.134883	0.247		0.347	0.161	0.248511	0.391559	0.20046	0.31752
0.216691	0.0717787	0.169413	0.105		0.0988442	0.0967463	0.164913	0.362119		0.0451155	0.0959769					0.410266	0.445428					0.288	0.129	0.238027	0.225401	0.329773	0.385419
0.333272	0.140559	0.179539	0.147		0.175893		0.158969	0.244536			0.0968356					0.59553	0.269736					0.196	0.4	0.319031	0.371408	0.259014	0.319407
0.45607	0.177484	0.145019	0.126		0.346815			0.425573			0.112418					0.361367	0.342749					0.321	0.19	0.266795	0.289578	0.348063	0.24388
0.401719	0.18752	0.132749	0.159		0.145127						0.082894					0.482897	0.332403						0.24	0.206249	0.219275	0.263029	0.406412
0.238	0.274679	0.0944391	0.106		0.22373						0.175904					0.174307	0.322954						0.287	0.272409	0.152579	0.410865	0.390227
0.389	0.161195	0.208	0.138								0.168549					0.473138	0.3622						0.274	0.171336	0.460986	0.392595	0.33255
0.357	0.226355	0.107	0.209								0.333057					0.205922	0.240807							0.164135	0.294597	0.344383	0.307776
0.495	0.15812	0.203	0.064								0.0772361					0.240797	0.373913							0.275227	0.459552	0.172527	0.282809
0.341	0.182632	0.197	0.172								0.0977729					0.235006	0.275743							0.301936	0.371004	0.313437	0.443288
0.358	0.112	0.1	0.066								0.0836097					0.163363	0.405326							0.746121	0.452077	0.407078	0.450241
0.251	0.097	0.089	0.078													0.248153	0.350456							0.512629	0.295468	0.219722	0.386371
0.281	0.11	0.117	0.097													0.193464	0.365564							0.466	0.289732	0.225082	0.358433
0.317	0.094	0.163	0.064													0.287916	0.331728							0.218988	0.2797	0.356798	0.411785
0.297	0.126	0.145	0.042														0.406896							0.181579	0.303435	0.284668	0.350124
0.261	0.107	0.172	0.137														0.181697							0.258299	0.349544	0.27399	0.344893
0.286	0.098	0.213	0.064																					0.165376	0.262202	0.359159	0.327414
0.575	0.081	0.173	0.121																					0.158359	0.323281	0.315751	0.35344
0.279	0.154	0.133	0.053																					0.163853	0.323667	0.185272	0.264792
0.312	0.102	0.072	0.162																					0.195472	0.326319	0.291078	0.315498
0.607	0.046	0.094	0.119																					0.195549	0.332026	0.178059	0.411195
0.348	0.088	0.218	0.068																					0.412921	0.249671	0.171471	0.434173
0.267	0.085	0.103	0.083																					0.238024	0.111269	0.231421	0.428512
0.22	0.122	0.135	0.169																					0.322774	0.0351524	0.199481	0.417045
0.212	0.255	0.151	0.131																					0.19174	0.276171	0.296052	0.36558
0.263	0.129	0.145	0.119																					0.277406	0.255652	0.227473
0.312	0.164	0.126	0.166																					0.242389	0.260329	0.107051
0.258	0.167	0.11	0.074																					0.439161	0.336014	0.215919
0.131	0.083	0.093	0.092																					0.341681	0.345362	0.455344
0.327	0.157	0.151	0.113																					0.450428	0.430737	0.345488
0.23	0.127	0.159	0.054																					0.381974	0.274498	0.464226
0.228	0.077	0.201																						0.317303	0.226537	0.282261
0.218	0.057	0.093																						0.387976	0.277743	0.179162
0.311	0.116	0.063																						0.377284	0.309964	0.187953
0.372	0.116	0.164																						0.458148		0.165411
0.337	0.124	0.087																						0.333785		0.203873
0.312	0.143	0.07																						0.337746		0.182827
0.247	0.077	0.134																						0.341376		0.138594
0.413	0.079	0.074																						0.344702		0.12754
0.211	0.098	0.077																						0.327829		0.40331
0.254	0.169	0.109																						0.241875		0.521919
0.363	0.091	0.094																						0.250691		0.413815
0.258	0.276	0.109																						0.345967		0.278273
0.329	0.145	0.186																						0.223695		0.416518
0.266	0.123	0.083																						0.305077		0.310451
0.264	0.079	0.188																						0.32354		0.365497
0.218	0.139	0.088																						0.298739		0.150704
0.249	0.149	0.12																						0.483277
0.137	0.124	0.108																						0.407828
0.159	0.173	0.08																						0.371707
0.228	0.126	0.168																						0.235047
0.226	0.097																							0.280586
0.285	0.168																							0.262137
0.232	0.079																							0.259685
0.208	0.121
0.346	0.105
0.412	0.062
0.327	0.15
0.245	0.058
0.277	0.138
0.329	0.114
0.23	0.067
0.151
0.301
0.424
0.172
0.225
0.577
0.354
0.341
1.043
0.211
0.271
0.373
0.29
0.231
0.405
