# Supplementary material for: A signal capture and proofreading mechanism for the KDEL-receptor explains selectivity and dynamic range in ER retrieval
Source: eLife. 2021 Jun 17;10:e68380. doi: 10.7554/eLife.68380 (PMC8248988; doi:10.7554/eLife.68380)
Supplement: Figure 4—figure supplement 1—source data 1. [file elife-68380-fig4-figsupp1-data1.xlsx]

## Sheet: Sheet1
Figure 4 - Supplement 1
WT –Ligand		WT +KDEL		WT +ADEL		WT +DDEL		E117Q –Ligand		E117Q +KDEL		E117Q +ADEL		E117Q +DDEL		E117N –Ligand		E117N +KDEL		E117N +ADEL		E117N +DDEL		E117A –Ligand		E117A +KDEL		E117A +ADEL		E117A +DDEL
Golgi signal for KDELR	Ligand intensity	Golgi signal for KDELR	Ligand intensity	Golgi signal for KDELR	Ligand intensity	Golgi signal for KDELR	Ligand intensity	Golgi signal for KDELR	Ligand intensity	Golgi signal for KDELR	Ligand intensity	Golgi signal for KDELR	Ligand intensity	Golgi signal for KDELR	Ligand intensity	Golgi signal for KDELR	Ligand intensity	Golgi signal for KDELR	Ligand intensity	Golgi signal for KDELR	Ligand intensity	Golgi signal for KDELR	Ligand intensity	Golgi signal for KDELR	Ligand intensity	Golgi signal for KDELR	Ligand intensity	Golgi signal for KDELR	Ligand intensity	Golgi signal for KDELR	Ligand intensity
0.384227	0.817	0.236788	13.778	0.444391	19.716	0.434439	48.716	0.339696	0.403	0.278121	156.86	0.161412	46.103	0.402593	9.414	0.391144	0.496	0.270274	264.971	0.277738	22.61	0.209137	525.914	0.400478	1.199	0.307675	103.975	0.275086	10.65	0.319816	22.816
0.281291	0.647	0.134681	41.889	0.453235	13.332	0.304091	347.321	0.392318	0.629	0.213212	279.23	0.157852	13.142	0.191193	28.403	0.414694	1.206	0.284446	50.159	0.331589	56.795	0.326612	1069.68	0.390616	1.21	0.33887	186.067	0.0912145	248.955	0.379354	17.262
0.463013	0.54	0.180469	7.887	0.42456	17.006	0.337668	3.976	0.346837	1.361	0.272781	135.99	0.205706	58.337	0.223388	8.589	0.447904	1.288	0.315352	89.137	0.258083	21.297	0.284261	56.097	0.463305	1.214	0.298655	40.944	0.232017	17.715	0.23755	8.379
0.329414	0.294	0.291188	24.579	0.311382	136.238	0.200465	142.517	0.448318	1.701	0.373605	114.158	0.138996	93.451	0.259245	10.682	0.505749	1.012	0.236779	50.689	0.228526	83.368	0.491671	25.98	0.499999	2.647	0.31597	364.201	0.261478	22.078	0.381329	5.665
0.300727	0.441	0.269608	25.266	0.366528	10.731	0.196565	31.706	0.354207	0.882	0.227265	839.791	0.126235	79.173	0.398917	22.091	0.323791	0.073	0.194311	33.117	0.204547	14.667	0.311627	619.74	0.32049	0.623	0.188097	98.278	0.0946398	289.253	0.26533	11.139
0.339099	0.684	0.239056	136.2	0.442651	20.541	0.301926	20.105	0.498514	1.035	0.250706	25.433	0.0753326	45.714	0.368982	10.715	0.440039	0.464	0.175827	71.734	0.274872	9.133	0.300446	553.962	0.368136	0.464	0.176626	110.515	0.102969	30.924	0.21874	9.068
0.25553	0.532	0.155124	50.644	0.456763	36.198	0.247625	16.906	0.227554	1.23	0.276827	45.423	0.18838	48.664	0.414285	115.114	0.398556	0.861	0.265861	46.116	0.258365	33.232	0.273058	37.112	0.227527	0.46	0.279535	13.961	0.235538	13.984	0.283941	80.881
0.31689	0.593	0.169818	25.886	0.377437	8.857	0.189383	50.538	0.390935	0.267	0.273997	81.168	0.262251	7.296	0.406386	57.054	0.424428	0.36	0.306941	156.352	0.217993	39.052	0.318194	8.806	0.39813	2.225	0.314023	154.854	0.24231	16.294	0.332484	8.657
0.285009	0.193	0.226863	44.769	0.383024	65.976	0.3111	7.854	0.45104	0.357	0.224833	52.037	0.13337	107.076	0.283954	38.559	0.443962	1.234	0.244594	78.598	0.217838	26.716	0.295236	22.671	0.355269	1.087	0.229891	53.253	0.149531	5.109	0.394947	30.313
0.334481	0.498	0.227692	13.835	0.386925	31.561	0.226193	72.344	0.503807	1.3	0.182507	114.618	0.247159	55.204	0.370311	53.749	0.245123	1.538	0.174708	322.519	0.254393	19.246	0.27895	51.67	0.458081	0.598	0.179231	77.965	0.178877	20.282	0.461885	7.324
0.28422	0.294	0.19117	29.439	0.459706	23.189	0.287182	35.816	0.411761	0.797	0.173662	185.401	0.252904	70.227	0.316708	20.705	0.312974	1.75	0.263456	53.563	0.274162	79.925	0.216598	42.491	0.236744	0.869	0.239882	100.614	0.248419	44.528	0.294883	105.66
0.290854	0.619	0.166909	82.026	0.56571	32.657	0.20561	3.422	0.317904	0.909	0.225401	307.694	0.300482	16.127	0.34799	78.827	0.29547	1.628	0.299584	164.912	0.258923	8.083	0.276154	82.158	0.325518	1.246	0.160973	12.034	0.180593	12.6	0.285443	37.866
0.367211	0.406	0.221362	85.32	0.519606	26.918	0.339776	7.523	0.433518	2.447	0.11634	194.686	0.315342	-1.136	0.368248	18.987	0.387479	1.637	0.312264	22.798	0.175384	17.261	0.272923	176.352	0.324503	1.745	0.18845	61.028	0.112137	69.355	0.410588	13.088
0.294425	0.39	0.109025	76.288	0.391174	28.871	0.357065	9.736	0.390096	1.592	0.0693304	1457.32	0.237545	11.63	0.375673	40.323	0.153493	1.002	0.356841	51.419	0.266975	86.622	0.284944	157.658	0.343848	1.78	0.178929	101.985	0.19826	4.596	0.363364	7.186
0.311862	0.396	0.0737613	199.788	0.320095	27.892	0.58393	18.227	0.601927	1.196	0.121999	165.497	0.153705	23.276	0.248873	14.325	0.336368	0.545	0.147911	24.49	0.210169	28.546	0.269774	79.551	0.150018	1.028	0.143103	85.876	0.119391	12.585	0.203185	29.334
0.2826	0.578	0.206376	12.881	0.36044	18.45	0.378791	7.646	0.739381	0.259	0.130748	442.197	0.215077	54.772	0.288866	17.142	0.37643	0.593	0.396278	48.829	0.204638	16.19	0.341421	102.262	0.433146	1.868	0.226799	174.493	0.216687	27.847	0.403023	8.241
0.361808	0.7	0.177928	14.372	0.400373	35.609	0.346437	19.051	0.50335	0.489	0.105706	274.105	0.183042	116.414	0.264522	53.915	0.451384	0.488	0.236835	37.882	0.200118	103.707	0.211452	26.255	0.433437	0.406	0.118543	51.685	0.22181	687.799	0.395555	12.332
0.343513	0.704	0.0941087	62.378	0.295951	83.285	0.352767	14.849	0.280796	0.239	0.163967	136.042	0.238495	34.074	0.47896	7.465	0.357143	0.614	0.231854	82.356	0.151744	34.263	0.227252	81.505	0.32707	0.502	0.164922	85.297	0.17946	10.392	0.225693	16.113
0.379325	0.569	0.214027	61.486	0.25577	11.352	0.346393	10.087	0.352488	0.627	0.225648	404.43	0.116084	33.688	0.269554	16.942	0.413113	0.278	0.267926	159.614	0.210099	67.355	0.206479	25.608	0.280011	0.333	0.196124	138.882	0.258088	430.329	0.415972	14.743
0.352343	0.658	0.144622	173.64	0.3622	22.047	0.24371	11.629	0.331853	0.884	0.099074	370.978	0.243512	660.264	0.364315	48.191	0.393403	0.922	0.121852	422.6	0.211516	42.02	0.480482	28.842	0.135929	0.915	0.199047	132.389	0.132208	30.134	0.327941	15.049
0.171527	0.572	0.145968	162.8	0.279519	9.528	0.342547	49.727	0.377172	0.56	0.15636	959.127	0.266067	9.119	0.420454	59.605	0.35286	0.745	0.186489	56.741	0.313736	37.878	0.239643	77.915	0.369302	0.454	0.167286	34.521	0.178408	19.808	0.252954	13.912
0.313473	0.419	0.202094	81.822	0.426525	27.5	0.278409	8.563	0.393006	0.588	0.21943	935.218	0.132191	202.713	0.370166	21.759	0.288901	0.315	0.0932113	247.715	0.262128	192.365	0.342987	79.171	0.377491	0.411	0.141379	20.718	0.21264	22.247	0.264061	16.509
0.288376	0.992	0.195367	271.262	0.422668	31.035	0.32437	6.631	0.341481	0.586	0.209943	62.256	0.276165	695.219	0.463511	15.812	0.530108	0.262	0.107157	374.165	0.251914	98.729	0.333057	18.362	0.452075	0.508	0.130349	5.984	0.294953	29.22	0.335604	7.831
0.380222	0.912	0.215165	310.564	0.325183	87.315	0.181702	13.866	0.320088	1.137	0.32264	42.044	0.205669	81.46	0.334289	15.599	0.318488	0.131	0.176015	438.384	0.366997	12.036	0.14211	26.301	0.34005	0.724	0.151068	25.893	0.126726	13.816	0.289251	477.414
0.271576	0.743	0.14593	48.166	0.282883	262.553	0.280869	17.981	0.47138	1.263	0.147628	87.991	0.300985	208.612	0.476274	37.806	0.35595	0.953	0.145745	177.039	0.255059	27.936	0.315079	53.883	0.304856	1.143	0.333797	84.672	0.20604	24.625	0.442047	26.098
0.520834	0.281	0.121302	108.338	0.366675	12.546	0.32441	250.848	0.301175	1.367	0.150973	158.164	0.123194	192.635	0.219357	8.491	0.455776	0.476	0.388809	60.936	0.329617	38.404	0.426065	72.811	0.280048	0.745	0.298856	18.591	0.178953	12.929	0.222426	112.248
0.439105	0.703	0.146712	23.155	0.47222	48.394	0.37691	22.675	0.479056	1.495	0.181998	21.03	0.215718	18.805	0.248007	35.397	0.408601	0.544	0.262856	319.63	0.182016	19.426	0.38304	21.364	0.387669	2.194	0.38944	19.279	0.160773	19.784	0.456136	5.388
0.236209	0.504	0.195721	13.924	0.200977	37.381	0.317834	5.968	0.299497	1.371	0.168123	479.497	0.217186	41.488	0.253804	15.202	0.394624	1.065	0.246447	178.51	0.191494	13.62	0.3425	181.684	0.444555	2.389	0.167043	29.885	0.321893	5.539	0.411761	18.025
0.278035	0.489	0.112751	32.945	0.332282	1.899	0.148846	12.923	0.264287	1.071	0.125951	316.478	0.148608	11.628	0.421378	28.142	0.401599	1.399	0.240811	345.448	0.244563	43.691	0.430192	23.121	0.35496	1.433	0.202895	39.157	0.174558	4.721	0.413186	7.407
0.344738	0.436	0.192774	49.704	0.320142	4.229	0.274288	12.575	0.449169	0.618	0.220981	64.696	0.177526	69.661	0.351365	49.671	0.471399	0.862	0.342991	259.601	0.161621	26.861	0.40517	9.57	0.251664	1.485	0.289515	61.826	0.234029	26.23	0.38407	15.723
0.312857	0.696	0.156066	13.955	0.312689	13.866	0.26964	36.89	0.410144	0.815	0.220578	49.525	0.272826	18.148	0.478103	69.791	0.422079	0.885	0.213758	187.143	0.166843	264.19	0.404468	10.018	0.342157	0.708	0.247005	228.874	0.198516	27.403	0.49139	4.318
0.365957	0.58	0.234615	9.301	0.371051	58.508	0.419258	56.106	0.335336	1.013	0.174541	110.216	0.311588	14.687	0.448284	331.435	0.461842	1.028	0.287529	67.522	0.127516	132.372	0.352471	155.796	0.368187	0.703	0.268034	83.01	0.215318	11.634	0.375534	19.033
0.533537	0.292	0.220922	250.163	0.232388	38.486	0.363491	3.725	0.321542	0.308	0.104535	81.56	0.250166	6.706	0.223115	73.104	0.370348	0.989	0.308326	896.177	0.0737967	146.705	0.38663	16.173			0.157641	10.095	0.235947	18.358	0.373071	7.721
0.457315	0.056	0.176207	56.303	0.369309	30.479	0.406175	79.467	0.309676	0.242	0.152477	148.841	0.280489	4.782	0.201116	33.19	0.339486	0.356	0.228493	160.195	0.185249	167.452	0.369761	12.5			0.146538	18.326	0.207415	8.41	0.260879	7.661
0.28947	0.157	0.143256	30.252	0.277521	10.86	0.65164	11.194	0.378685	0.528	0.222808	324.569	0.156463	9.844	0.433677	60.223	0.397036	0.888	0.164274	89.696	0.175092	84.852	0.35865	4.582			0.137956	47.393	0.307071	11.247	0.493627	3.836
0.251487	0.617	0.157397	157.57	0.39929	14.309	0.374968	11.2	0.295265	0.745	0.242977	152.054	0.159581	16.792	0.389429	40.081	0.21884	1.242	0.142596	24.962	0.1665	338.571	0.280659	13.399			0.295745	110.764	0.21553	24.339	0.31672	9.279
0.56926	0.377	0.168606	125.284	0.199505	210.01	0.592734	7.01	0.281054	1.18	0.331564	152.818	0.13667	33.102	0.408792	17.086	0.304856	1.504	0.219344	26.292	0.142764	389.984	0.319118	46.07			0.156565	154.852	0.22139	165.218
0.352635	0.533	0.0992185	25.526	0.227824	16.863	0.166521	59.632	0.293379	1.078	0.358005	197.69	0.235548	31.863	0.36541	11.143	0.314803	0.974	0.206751	20.932	0.17946	93.854	0.36682	31.471			0.323909	11.102	0.254705	1015.53
0.413256	0.208	0.171897	15.187	0.248585	13.391	0.385057	25.988	0.352653	1.314	0.320672	92.842	0.206648	24.806	0.507992	45.177	0.284228	0.233	0.273005	47.145	0.271784	30.346	0.200629	14.725			0.317706	10.629	0.123595	14.603
0.516925	0.046	0.132543	239.211	0.34155	16.192	0.271815	66.14	0.339709	1.009	0.29032	88.001	0.180669	43.896	0.482265	61.162	0.385344	1.321	0.248848	26.435	0.270205	35.899	0.222425	28.045			0.226888	7.935	0.242295	6.471
0.439246	0.4	0.0969072	72.628	0.240166	9.522	0.358768	51.727	0.23033	1.133	0.282935	76.616	0.181604	30.456	0.182694	18.527	0.362874	0.811	0.0828877	113.233	0.240845	397.367	0.363163	35.358			0.258183	102.322	0.225291	7.22
0.310865	0.399	0.174616	79.366	0.218045	9.343	0.463214	51.794	0.332488	0.995	0.39768	52.507	0.201739	60.143	0.198923	43.001	0.292132	0.443	0.122501	230.175	0.229986	161.979	0.169138	77.87					0.323081	7.174
0.359166	0.087	0.133767	31.154	0.375047	9.126	0.32223	38.716	0.306388	1.225	0.155907	49.905	0.159394	12.374	0.174193	26.762	0.385656	0.246	0.0661009	273.703	0.147861	419.958	0.347329	14.983					0.215229	17.757
0.308597	0.142	0.173441	31.479	0.464525	8.497	0.633508	31.085	0.309046	1.179	0.163044	48.795	0.213476	40.496	0.516989	127.243	0.420676	0.567	0.148581	219.902	0.198831	74.053	0.272065	69.966					0.188344	45.449
0.440566	0.547			0.340228	100.277	0.33221	42.422	0.243565	1.248	0.367374	353.042	0.241288	11.758	0.401764	5.901	0.319867	1.204	0.122747	477.095	0.200866	146.888	0.233657	4.86					0.280879	8.334
0.341491	0.445			0.343922	3.655	0.396814	66.217	0.451436	1.313	0.382678	22.93	0.246995	52.192	0.353264	11.293	0.162024	1.077	0.180294	1922.85	0.194001	26.191	0.314615	18.07					0.20404	6.271
0.271592	0.386			0.243269	2.788	0.335657	340.669	0.393548	1.389	0.381415	73.619	0.147805	27.21	0.160852	122.405	0.417389	0.782	0.151942	470.384	0.343716	5.643	0.358419	583.792					0.244954	13.577
0.23172	0.514			0.249542	8.898	0.306963	42.235	0.27022	0.372	0.230842	227.559	0.261647	30.915	0.178036	147.745	0.464456	0.221	0.171939	292.569	0.356303	32.645	0.351498	443.663					0.262342	6.56
0.345309	0.321			0.371405	26.409	0.354029	19.2	0.363786	0.874	0.168013	74.4			0.2785	423.125			0.27271	128	0.232748	164.981	0.529463	161.653					0.192031	5.958
0.261708	0.579			0.409659	42.554	0.235673	64.22	0.267105	1.134	0.241325	28.044			0.378701	1510.53			0.26489	157.484	0.276793	43.299	0.313039	37.857					0.294841	6.67
				0.332518	141.326	0.33268	25.548	0.331113	2.075					0.423531	23.616			0.249447	264.551	0.207804	200.978	0.280945	10.456					0.178136	13.463
				0.327714	1792.51	0.377022	71.803	0.534253	2.076					0.595257	40.097			0.182012	424.923	0.291804	6.636	0.289025	42.661					0.275003	6.603
				0.330305	28.671	0.390586	116.022	0.321553	1.517					0.417782	31.462			0.288936	265.356	0.203187	37.941	0.288927	79.805					0.132012	19.614
				0.356211	153.853	0.41855	42.24	0.374442	0.919					0.524313	28.995			0.214498	105.806	0.188576	29.969	0.278751	1731.82					0.0993234	17.959
				0.358711	12.736	0.41565	119.688	0.252797	1.018					0.361804	270.92			0.32491	225.945	0.11207	2287.59	0.285063	125.922					0.106659	28.696
						0.347317	62.914	0.288623	0.919					0.51505	9.947			0.193243	321.103	0.199611	95.502	0.307991	105.861					0.0972971	58.195
						0.515501	68.841	0.278306	0.739					0.429177	8.024			0.307954	83.722	0.193073	489.369	0.211383	59.255					0.109729	139.925
						0.258326	30.898	0.303078	1.843					0.463971	13.514			0.206245	63.575	0.189295	67.575	0.347194	9.555
						0.353594	14.016	0.14201	1.264					0.454672	44.307			0.411125	44.243	0.147627	35.752	0.469393	39.546
						0.222864	610.93	0.333472	1.357									0.123517	385.535	0.118707	47.678	0.30655	20.201
						0.173396	96.053	0.27801	1.061									0.245609	174.4	0.132028	22.672	0.422346	16.404
						0.261258	450.355	0.29756	0.924									0.214882	121.123	0.181429	32.485	0.35354	48.052
						0.298812	17.158	0.399242	0.851									0.144448	178.857	0.165627	25.493	0.557726	30.261
						0.226928	8.028	0.363323	1.444									0.313669	965.642	0.210608	65.751	0.330814	12.414
						0.218175	21.09	0.334289	0.738													0.374508	20.171
						0.341915	33.095	0.275876	1.809													0.220926	28.503
						0.440763	16.711	0.423426	1.7													0.44318	11.274
						0.261501	57.176	0.419976	1.518													0.386157	20.663
						0.291036	26.821															0.364003	84.957
																						0.402726	27.782
																						0.32507	12.273
																						0.312554	27.362
																						0.331156	18.79
																						0.343239	100.183
																						0.414237	48.399
																						0.459232	37.022
																						0.249845	29.214
																						0.351941	21.163
