# Supplementary material for: A signal capture and proofreading mechanism for the KDEL-receptor explains selectivity and dynamic range in ER retrieval
Source: eLife. 2021 Jun 17;10:e68380. doi: 10.7554/eLife.68380 (PMC8248988; doi:10.7554/eLife.68380)
Supplement: Figure 4—source data 1. [file elife-68380-fig4-data1.xlsx]

## Sheet: Sheet1
Figure 4b
E117Q no ligand	E117Q +KDEL	E117Q +ADEL	E117Q +DDEL	E117N no ligand	E117N +KDEL	E117N +ADEL	E117N +DDEL	E117A no ligand	E117A +KDEL	E117A +ADEL	E117A +DDEL
0.339696	0.278121	0.161412	0.402593	0.391144	0.270274	0.277738	0.209137	0.400478	0.307675	0.275086	0.319816
0.392318	0.213212	0.157852	0.191193	0.414694	0.284446	0.331589	0.326612	0.390616	0.33887	0.0912145	0.379354
0.346837	0.272781	0.205706	0.223388	0.447904	0.315352	0.258083	0.284261	0.463305	0.298655	0.232017	0.23755
0.448318	0.373605	0.138996	0.259245	0.505749	0.236779	0.228526	0.491671	0.499999	0.31597	0.261478	0.381329
0.354207	0.227265	0.126235	0.398917	0.323791	0.194311	0.204547	0.311627	0.32049	0.188097	0.0946398	0.26533
0.498514	0.250706	0.0753326	0.368982	0.440039	0.175827	0.274872	0.300446	0.368136	0.176626	0.102969	0.21874
0.227554	0.276827	0.18838	0.414285	0.398556	0.265861	0.258365	0.273058	0.227527	0.279535	0.235538	0.283941
0.390935	0.273997	0.262251	0.406386	0.424428	0.306941	0.217993	0.318194	0.39813	0.314023	0.24231	0.332484
0.45104	0.224833	0.13337	0.283954	0.443962	0.244594	0.217838	0.295236	0.355269	0.229891	0.149531	0.394947
0.503807	0.182507	0.247159	0.370311	0.245123	0.174708	0.254393	0.27895	0.458081	0.179231	0.178877	0.461885
0.411761	0.173662	0.252904	0.316708	0.312974	0.263456	0.274162	0.216598	0.236744	0.239882	0.248419	0.294883
0.317904	0.225401	0.300482	0.34799	0.29547	0.299584	0.258923	0.276154	0.325518	0.160973	0.180593	0.285443
0.433518	0.11634	0.315342	0.368248	0.387479	0.312264	0.175384	0.272923	0.324503	0.18845	0.112137	0.410588
0.390096	0.0693304	0.237545	0.375673	0.153493	0.356841	0.266975	0.284944	0.343848	0.178929	0.19826	0.363364
0.601927	0.121999	0.153705	0.248873	0.336368	0.147911	0.210169	0.269774	0.150018	0.143103	0.119391	0.203185
0.739381	0.130748	0.215077	0.288866	0.37643	0.396278	0.204638	0.341421	0.433146	0.226799	0.216687	0.403023
0.50335	0.105706	0.183042	0.264522	0.451384	0.236835	0.200118	0.211452	0.433437	0.118543	0.22181	0.395555
0.280796	0.163967	0.238495	0.47896	0.357143	0.231854	0.151744	0.227252	0.32707	0.164922	0.17946	0.225693
0.352488	0.225648	0.116084	0.269554	0.413113	0.267926	0.210099	0.206479	0.280011	0.196124	0.258088	0.415972
0.331853	0.099074	0.243512	0.364315	0.393403	0.121852	0.211516	0.480482	0.135929	0.199047	0.132208	0.327941
0.377172	0.15636	0.266067	0.420454	0.35286	0.186489	0.313736	0.239643	0.369302	0.167286	0.178408	0.252954
0.393006	0.21943	0.132191	0.370166	0.288901	0.0932113	0.262128	0.342987	0.377491	0.141379	0.21264	0.264061
0.341481	0.209943	0.276165	0.463511	0.530108	0.107157	0.251914	0.333057	0.452075	0.130349	0.294953	0.335604
0.320088	0.32264	0.205669	0.334289	0.318488	0.176015	0.366997	0.14211	0.34005	0.151068	0.126726	0.289251
0.47138	0.147628	0.300985	0.476274	0.35595	0.145745	0.255059	0.315079	0.304856	0.333797	0.20604	0.442047
0.301175	0.150973	0.123194	0.219357	0.455776	0.388809	0.329617	0.426065	0.280048	0.298856	0.178953	0.222426
0.479056	0.181998	0.215718	0.248007	0.408601	0.262856	0.182016	0.38304	0.387669	0.38944	0.160773	0.456136
0.299497	0.168123	0.217186	0.253804	0.394624	0.246447	0.191494	0.3425	0.444555	0.167043	0.321893	0.411761
0.264287	0.125951	0.148608	0.421378	0.401599	0.240811	0.244563	0.430192	0.35496	0.202895	0.174558	0.413186
0.449169	0.220981	0.177526	0.351365	0.471399	0.342991	0.161621	0.40517	0.251664	0.289515	0.234029	0.38407
0.410144	0.220578	0.272826	0.478103	0.422079	0.213758	0.166843	0.404468	0.342157	0.247005	0.198516	0.49139
0.335336	0.174541	0.311588	0.448284	0.461842	0.287529	0.127516	0.352471	0.368187	0.268034	0.215318	0.375534
0.321542	0.104535	0.250166	0.223115	0.370348	0.308326	0.0737967	0.38663		0.157641	0.235947	0.373071
0.309676	0.152477	0.280489	0.201116	0.339486	0.228493	0.185249	0.369761		0.146538	0.207415	0.260879
0.378685	0.222808	0.156463	0.433677	0.397036	0.164274	0.175092	0.35865		0.137956	0.307071	0.493627
0.295265	0.242977	0.159581	0.389429	0.21884	0.142596	0.1665	0.280659		0.295745	0.21553	0.31672
0.281054	0.331564	0.13667	0.408792	0.304856	0.219344	0.142764	0.319118		0.156565	0.22139
0.293379	0.358005	0.235548	0.36541	0.314803	0.206751	0.17946	0.36682		0.323909	0.254705
0.352653	0.320672	0.206648	0.507992	0.284228	0.273005	0.271784	0.200629		0.317706	0.123595
0.339709	0.29032	0.180669	0.482265	0.385344	0.248848	0.270205	0.222425		0.226888	0.242295
0.23033	0.282935	0.181604	0.182694	0.362874	0.0828877	0.240845	0.363163		0.258183	0.225291
0.332488	0.39768	0.201739	0.198923	0.292132	0.122501	0.229986	0.169138			0.323081
0.306388	0.155907	0.159394	0.174193	0.385656	0.0661009	0.147861	0.347329			0.215229
0.309046	0.163044	0.213476	0.516989	0.420676	0.148581	0.198831	0.272065			0.188344
0.243565	0.367374	0.241288	0.401764	0.319867	0.122747	0.200866	0.233657			0.280879
0.451436	0.382678	0.246995	0.353264	0.162024	0.180294	0.194001	0.314615			0.20404
0.393548	0.381415	0.147805	0.160852	0.417389	0.151942	0.343716	0.358419			0.244954
0.27022	0.230842	0.261647	0.178036	0.464456	0.171939	0.356303	0.351498			0.262342
0.363786	0.168013		0.2785		0.27271	0.232748	0.529463			0.192031
0.267105	0.241325		0.378701		0.26489	0.276793	0.313039			0.294841
0.331113			0.423531		0.249447	0.207804	0.280945			0.178136
0.534253			0.595257		0.182012	0.291804	0.289025			0.275003
0.321553			0.417782		0.288936	0.203187	0.288927			0.132012
0.374442			0.524313		0.214498	0.188576	0.278751			0.0993234
0.252797			0.361804		0.32491	0.11207	0.285063			0.106659
0.288623			0.51505		0.193243	0.199611	0.307991			0.0972971
0.278306			0.429177		0.307954	0.193073	0.211383			0.109729
0.303078			0.463971		0.206245	0.189295	0.347194
0.14201			0.454672		0.411125	0.147627	0.469393
0.333472					0.123517	0.118707	0.30655
0.27801					0.245609	0.132028	0.422346
0.29756					0.214882	0.181429	0.35354
0.399242					0.144448	0.165627	0.557726
0.363323					0.313669	0.210608	0.330814
0.334289							0.374508
0.275876							0.220926
0.423426							0.44318
0.419976							0.386157
							0.364003
							0.402726
							0.32507
							0.312554
							0.331156
							0.343239
							0.414237
							0.459232
							0.249845
							0.351941
