# Supplementary material for: A signal capture and proofreading mechanism for the KDEL-receptor explains selectivity and dynamic range in ER retrieval
Source: eLife. 2021 Jun 17;10:e68380. doi: 10.7554/eLife.68380 (PMC8248988; doi:10.7554/eLife.68380)
Supplement: Figure 5—figure supplement 1—source data 1. [file elife-68380-fig5-figsupp1-data1.xlsx]

## Sheet: Sheet1
Figure 5 - Supplement 1d
No ligand	KDELsec	RDELsec	HDELsec	ADELsec	DDELsec	Sc.BiP CT	Sp.BiP CT	Sp.BiP CT A>K	Kl.BiP CT	Kl.BiP CT D>K
0.38499	0.330738	0.147912	0.303655	0.291555	0.390444	0.331496	0.361779	0.217382	0.217333	0.306854
0.354806	0.243794	0.217629	0.2576	0.168174	0.47311	0.146299	0.503806	0.323438	0.200011	0.141833
0.379253	0.18087	0.162883	0.240266	0.235503	0.440717	0.0580894	0.46785	0.260236	0.3288	0.149549
0.266166	0.206975	0.236928	0.172833	0.197714	0.419749	0.12416	0.356357	0.177375	0.233064	0.151776
0.44095	0.163675	0.246219	0.172305	0.279792	0.335141	0.262688	0.371573	0.276442	0.238211	0.123487
0.32981	0.28029	0.2172	0.0917243	0.3272	0.493006	0.129294	0.432799	0.16673	0.36524	0.113679
0.242721	0.258249	0.178349	0.206977	0.126419	0.425755	0.159786	0.317243	0.230912	0.376973	0.128526
0.327631	0.170649	0.193666	0.146278	0.265858	0.316138	0.220144	0.450583	0.28681	0.374114	0.198044
0.24951	0.126923	0.274697	0.162949	0.26917	0.313691	0.249043	0.386856	0.318372	0.364956	0.137197
0.271713	0.226501	0.24323	0.3021	0.184281	0.294555	0.19824	0.32068	0.265433	0.329775	0.268654
0.298048	0.16886	0.203301	0.172085	0.27138	0.452398	0.208505	0.542819	0.2289	0.429607	0.139987
0.253979	0.200257	0.241486	0.0887557	0.304504	0.230858	0.161915	0.413033	0.171858	0.259167	0.16413
0.309511	0.260071	0.137119	0.327382	0.229484	0.261652	0.216897	0.435973	0.230695	0.267531	0.208577
0.329896	0.406559	0.161701	0.19363	0.291203	0.252504	0.303876	0.312576	0.172086	0.397864	0.268574
0.519376	0.199586	0.133215	0.197808	0.359821	0.441728	0.147336	0.410449	0.254464	0.351648	0.251012
0.374613	0.136074	0.197623	0.230583	0.369325	0.167898	0.242528	0.343331	0.221871	0.411196	0.184367
0.432142	0.1868	0.14843	0.283823	0.258364	0.214852	0.160254	0.415723	0.232345	0.296873	0.180059
0.339251	0.222305	0.258069	0.176947	0.231917	0.279102	0.171067	0.419637	0.180144	0.250255	0.366889
0.428167	0.222928	0.177667	0.285172	0.328057	0.266797	0.207266	0.445365	0.148668	0.164617	0.112754
0.390181	0.201804	0.206638	0.264213	0.225185	0.422007	0.202158	0.41084	0.112903	0.18691	0.174257
0.321963	0.173329	0.208933	0.208858	0.298059	0.354181	0.228104	0.297871	0.18498	0.26438	0.233781
0.368912	0.134294	0.193477	0.201363	0.362682	0.254062	0.193687	0.385504	0.271399	0.377096	0.102128
0.395572	0.18036	0.260415	0.222485	0.272347	0.192727	0.230886	0.311904	0.188603	0.296307	0.232662
0.351574	0.169063	0.22283	0.195653	0.315325	0.301846	0.122867	0.353767	0.174493	0.187704	0.132042
0.371548	0.205777	0.165062	0.203845	0.32007	0.314298	0.274818	0.368277	0.226384	0.42943	0.176318
0.403655	0.12951	0.240977	0.163703	0.271792	0.337424	0.247264	0.401802	0.236097	0.292939	0.144272
0.307148	0.264004	0.223087	0.195449	0.34933	0.289092	0.186176	0.376538	0.239936	0.25938	0.180868
0.286809	0.249816	0.163345	0.303404	0.330025	0.358839	0.267103	0.294789	0.179425	0.370039	0.121004
0.344478	0.188834		0.275239	0.201499	0.354976	0.234133	0.310925	0.265046	0.263512	0.140329
0.290809	0.279597		0.209737	0.267437	0.364718	0.189848	0.415744	0.209542	0.380092	0.218926
0.389715	0.283946		0.273517	0.29848	0.380324	0.156361	0.419564	0.278764	0.345143	0.210466
0.348115	0.213402		0.271637	0.287378	0.306765	0.220388	0.278973	0.270799	0.160021	0.254771
0.245332	0.178731		0.227029	0.29502	0.326001	0.17867	0.370135	0.287963	0.358196	0.224722
0.448405			0.244983	0.377479	0.418314	0.193663	0.513864	0.280387	0.29856	0.166927
0.608298			0.173158	0.408364	0.312701	0.155195	0.449475	0.206635	0.329176	0.212533
0.346508			0.219097	0.434578	0.349582	0.207259	0.403997	0.199236	0.299443	0.226727
0.240481			0.263652	0.32788	0.338754	0.234702	0.441991	0.213893	0.363827	0.194471
0.399366			0.162713	0.426575	0.45489	0.202869	0.510669	0.292036	0.307461	0.205636
0.316427			0.27249	0.328628	0.302894	0.191738	0.374475	0.157806	0.483824	0.214318
0.306039			0.193699	0.288873	0.326178	0.203076	0.471037	0.203553	0.339335	0.121738
0.413923			0.214438	0.376145	0.299186	0.247484	0.432757	0.245826	0.14835	0.201328
0.500639			0.351025	0.288097	0.297279	0.238508	0.377028	0.227661	0.249599	0.155312
0.315977			0.274788	0.38461	0.424875	0.327331	0.290205	0.212535	0.404382	0.17049
0.369577			0.257187	0.387815	0.551311	0.22302	0.362084	0.243819	0.444877	0.23032
0.344692			0.295563	0.443282	0.547457	0.184536	0.436936	0.251024	0.296846	0.261022
0.437755			0.125318	0.414035	0.432534	0.173848	0.256878	0.260672	0.35496	0.185596
0.527657			0.20909	0.299425	0.768499	0.234325	0.231584	0.181163	0.312465	0.24436
			0.201156	0.229697	0.647352	0.241223	0.316504	0.282831	0.41137	0.179664
			0.187237	0.368424	0.547393	0.226858	0.253412	0.196704	0.251813	0.236126
			0.182082	0.369665	0.440115	0.25097	0.295062	0.144037	0.225327	0.228366
			0.234181	0.351427	0.42143	0.274368	0.164056	0.208831	0.469625	0.222894
			0.254888	0.376662	0.300276	0.362317	0.387854	0.247492	0.527951	0.166121
			0.180114	0.359855	0.357954	0.192061	0.179283		0.322456	0.230206
			0.210652	0.256074	0.361387	0.294832	0.456363		0.445637	0.189808
				0.440817	0.447704	0.217021	0.347924		0.387847	0.17141
				0.403434	0.2075	0.327554	0.441		0.367953	0.251727
				0.371198	0.448977		0.468065		0.196083
				0.334808	0.304759				0.1894
				0.414834	0.380269				0.35254
				0.468666	0.319383				0.432944
				0.241094					0.297897
				0.388209					0.325372
				0.368729					0.269062
				0.411038					0.265827
				0.529491					0.328662
				0.390761					0.382433
				0.500727
				0.359534
				0.370521
				0.254958
				0.431397
				0.431173
