# Supplementary material for: A signal capture and proofreading mechanism for the KDEL-receptor explains selectivity and dynamic range in ER retrieval
Source: eLife. 2021 Jun 17;10:e68380. doi: 10.7554/eLife.68380 (PMC8248988; doi:10.7554/eLife.68380)
Supplement: Figure 6—figure supplement 1—source data 1. [file elife-68380-fig6-figsupp1-data1.xlsx]

## Sheet: Sheet1
Figure 6 - Supplement 1b
N54R no ligand	N54R +KDEL	N54R +ADEL	N54R +DDEL	D50N N54R no ligand	D50N N54R +KDEL	D50N N54R +ADEL	D50N N54R +DDEL	D50N E117N no ligand	D50N E117N +KDEL	D50N E117N +ADEL	D50N E117N +DDEL	N54R E117N no ligand	N54R E117N +KDEL	N54R E117N +ADEL	N54R E117N +DDEL	D50N N54R E117N no ligand	D50N N54R E117N +KDEL	D50N N54R E117N +ADEL	D50N N54R E117N +DDEL	D50N N54R E117N W120A no ligand	D50N N54R E117N W120A +KDEL	D50N N54R E117N W120A +ADEL	D50N N54R E117N W120A +DDEL
0.251365	0.265499	0.113082	0.348945	0.388927	0.17646	0.281499	0.222011	0.393879	0.239239	0.167906	0.244851	0.586635	0.190953	0.265841	0.214486	0.360206	0.283546	0.34219	0.211349	0.337218	0.35954	0.322267	0.197265
0.399338	0.351327	0.371738	0.199216	0.269546	0.169866	0.318778	0.253038	0.395477	0.244514	0.332031	0.179285	0.320307	0.0971336	0.17128	0.306255	0.443332	0.442671	0.245751	0.279493	0.357226	0.420304	0.343585	0.299636
0.266661	0.240438	0.146614	0.295447	0.290766	0.22541	0.279675	0.158367	0.437758	0.486442	0.123764	0.146899	0.394793	0.169836	0.102014	0.364502	0.604622	0.271595	0.233547	0.111792	0.352607	0.394267	0.335497	0.24506
0.261599	0.183644	0.209903	0.203896	0.409239	0.188375	0.235313	0.140927	0.406218	0.188864	0.279045	0.147754	0.360028	0.0754798	0.129657	0.382129	0.379063	0.325566	0.184973	0.235054	0.306291	0.323664	0.326328	0.12318
0.308517	0.170877	0.202757	0.215427	0.347264	0.245785	0.158637	0.226652	0.189652	0.464416	0.259143	0.178685	0.359622	0.191903	0.202632	0.42124	0.338019	0.127514	0.271745	0.137335	0.218345	0.384446	0.336832	0.145921
0.276299	0.106484	0.169492	0.190112	0.435858	0.182278	0.136856	0.192373	0.257974	0.452135	0.237924	0.336735	0.290747	0.0995169	0.127222	0.322425	0.384624	0.359056	0.283926	0.218267	0.319191	0.376993	0.321673	0.144753
0.243979	0.197187	0.27281	0.280897	0.231687	0.189036	0.302159	0.25986	0.400992	0.432873	0.152387	0.149025	0.313107	0.199005	0.175422	0.402748	0.265162	0.203872	0.200804	0.207336	0.216632	0.633345	0.42339	0.170105
0.217186	0.0903445	0.303041	0.307747	0.291978	0.141197	0.11683	0.158837	0.389728	0.307048	0.131946	0.155014	0.258098	0.114224	0.137258	0.250162	0.389817	0.193939	0.192803	0.247094	0.248041	0.393787	0.465008	0.244328
0.170357	0.199954	0.37053	0.259685	0.286546	0.174231	0.12559	0.179402	0.210972	0.44755	0.343013	0.160132	0.424447	0.156622	0.123239	0.326895	0.492853	0.421682	0.143158	0.215441	0.279905	0.254541	0.30922	0.275646
0.359076	0.30936	0.29733	0.244049	0.105384	0.198599	0.214986	0.192019	0.273337	0.486771	0.271772	0.15319	0.337404	0.14237	0.275468	0.25738	0.256871	0.241392	0.274331	0.244674	0.292016	0.558515	0.198974	0.192309
0.287089	0.22612	0.255131	0.188742	0.32805	0.231897	0.305682	0.210859	0.222914	0.518686	0.272454	0.199333	0.35199	0.114067	0.169068	0.282968	0.228827	0.165122	0.260367	0.288175	0.362417	0.563336	0.433523	0.28821
0.141466	0.202954	0.393002	0.202275	0.230474	0.218259	0.322072	0.231375	0.507997	0.208216	0.297784	0.212695	0.229465	0.175178	0.21564	0.350648	0.28127	0.29621	0.27322	0.303325	0.441751	0.30945	0.316262	0.217245
0.289916	0.284777	0.296527	0.274587	0.221564	0.177001	0.274023	0.255358	0.47515	0.340376	0.28726	0.174241	0.63248	0.169919	0.141002	0.247339	0.324693	0.314387	0.200298	0.095087	0.384026	0.324865	0.424916	0.221581
0.156058	0.228196	0.294847	0.311823	0.282535	0.229175	0.163195	0.230587	0.159182	0.142129	0.316401	0.244148	0.340866	0.199917	0.1704	0.143252	0.217081	0.238597	0.162109	0.224573	0.395582	0.249042	0.281517	0.253354
0.274073	0.184539	0.206234	0.323943	0.375727	0.190968	0.160432	0.235137	0.352717	0.185653	0.220839	0.271857	0.375235	0.326234	0.11837	0.167838	0.350203	0.233231	0.114102	0.166655	0.277792	0.369233	0.241209	0.239149
0.311734	0.217482	0.239182	0.166202	0.406411	0.17056	0.233915	0.274509	0.402365	0.168934	0.306764	0.163384	0.330799	0.104088	0.102928	0.232574	0.374576	0.272932	0.314869	0.308611	0.324039	0.297621	0.242542	0.201077
0.19542	0.191171	0.173595	0.265653	0.260345	0.203727	0.130738	0.215447	0.366056	0.15695	0.228533	0.160877	0.385255	0.206177	0.184726	0.185954	0.354873	0.300022	0.236348	0.188881	0.285772	0.324164	0.188257	0.326784
0.361297	0.0912669	0.188243	0.256831	0.419104	0.137421	0.124106	0.120748	0.465008	0.329817	0.29805	0.310055	0.283464	0.18918	0.155921	0.346147	0.217754	0.202284	0.240709	0.228516	0.481014	0.408259	0.294162	0.243319
0.200644	0.120679	0.190125	0.289574	0.372032	0.179947	0.184505	0.173855	0.299292	0.400057	0.157951	0.123303	0.241895	0.260765	0.188615	0.273977	0.354082	0.28332	0.318115	0.269781	0.361859	0.391032	0.232436	0.325062
0.2344	0.198358	0.337561	0.312973	0.429794	0.177795	0.166577	0.17454	0.2059	0.194892	0.148617	0.197735	0.303542	0.0949466	0.123028	0.171882	0.333514	0.347939	0.250364	0.242811	0.385825	0.164865	0.278191	0.223372
0.269531	0.171056	0.191636	0.295479	0.604354	0.253472	0.124702	0.234002	0.218506	0.385774	0.179363	0.121802	0.317512	0.247477	0.193475	0.204212	0.224935	0.242341	0.272965	0.19668	0.399362	0.39749	0.412535	0.230722
0.363996	0.237988	0.17227	0.228628	0.49625	0.176256	0.19627	0.227075	0.258069	0.229325	0.145432	0.0606128	0.232351	0.149755	0.203386	0.1477	0.269003	0.437889	0.132305	0.194752	0.40947	0.315045	0.459987	0.266353
0.387789	0.104323	0.374219	0.183902	0.413919	0.221537	0.325301	0.216999	0.24436	0.228743	0.0967576	0.240758	0.289263	0.144653	0.252021	0.157636	0.208329	0.298793	0.157684	0.21509	0.359065	0.322289	0.418703	0.20623
0.3381	0.207509	0.291616	0.220523	0.400739	0.206323	0.147657	0.271895	0.298563	0.201894	0.130451	0.102288	0.246384	0.200516	0.157093	0.222027	0.307441	0.519922	0.192418	0.235906	0.27153	0.39362	0.384046	0.437807
0.314995	0.200419	0.289531	0.341254	0.555867	0.202206	0.182998	0.1529	0.301	0.328159	0.124387	0.175022	0.43605	0.197474	0.184332	0.287054	0.258424	0.286368	0.249634	0.156266	0.327584	0.33932	0.319457	0.1835
0.268805	0.109164	0.214241	0.21017	0.509876	0.193466	0.148891	0.17805	0.390427	0.22961	0.236417	0.241096	0.388699	0.231324	0.105782	0.228722	0.306198	0.210601	0.288797	0.365634	0.207428	0.376908	0.391737	0.195256
0.272906	0.149129	0.19315	0.270856	0.423761	0.217607	0.175069	0.127317	0.285588	0.404371	0.238534	0.128759	0.349492	0.188274	0.185667	0.18368	0.269805	0.312032	0.195921	0.351232	0.30625	0.523374	0.435805	0.18971
0.399739	0.130703	0.224773	0.193819	0.36874	0.190431	0.153709	0.195151	0.563328	0.264628	0.207934	0.164581	0.286705	0.275345	0.147901	0.352862	0.231305	0.198225	0.3565	0.262434	0.218924	0.578621	0.466545	0.241106
0.365559	0.117615	0.272291	0.250632	0.442604	0.243849	0.148377	0.273194	0.418999	0.195226	0.235949	0.187606	0.28275	0.150899	0.0895237	0.274968	0.300207	0.333225	0.207585	0.179353	0.249664	0.466403	0.500654	0.255737
0.414074	0.108201	0.207012	0.154785	0.51435	0.185462	0.330156	0.215296	0.635408	0.153836	0.250544	0.176543	0.265985	0.232774			0.291696	0.301077	0.214637	0.136954	0.383604	0.315077	0.374312	0.283208
0.315773	0.118736	0.247497	0.198537	0.439515		0.218969	0.224204	0.421736	0.149063	0.232614		0.375077	0.250169			0.467924	0.215851	0.157771	0.125781	0.285478	0.507786	0.48073	0.296338
0.280209	0.160006	0.155064	0.36872	0.452103				0.494494	0.177004	0.216547		0.313463				0.320718	0.311145	0.258087	0.13974	0.287987	0.320544	0.289798	0.187829
0.242659	0.166504	0.187733	0.210212	0.370783				0.415782	0.319891	0.210451						0.278614	0.276595	0.30005	0.187983	0.355911	0.378813	0.511346	0.279878
0.24418	0.148616	0.230824	0.217531	0.431721				0.577955	0.35052	0.188457						0.414109	0.344213	0.236508	0.246679	0.289162	0.419468	0.417775	0.243785
0.306165	0.191147	0.170005	0.215666	0.384084				0.368654		0.168544						0.291411	0.487186	0.162664	0.137948	0.334213	0.51781	0.376699	0.246595
0.276706	0.130226	0.389813	0.364816	0.452839				0.517467								0.342421	0.257941	0.169027	0.267018	0.467087	0.520147	0.359471	0.273535
0.323751	0.141056		0.220985	0.470186												0.360258	0.28943	0.199962	0.216623	0.263523	0.367099	0.523166	0.158794
0.219047	0.132968		0.225022	0.232599												0.5139	0.338541	0.0940014	0.152634	0.320663	0.313602	0.323388	0.243556
0.271824	0.22531		0.190941	0.296199													0.32723		0.205765	0.278419		0.414113
0.383222	0.158962		0.215325	0.274079													0.107338		0.285318	0.355772
0.33534	0.177384		0.149897	0.301108																0.249438
0.303222				0.343905																0.346581
0.240925				0.386361
				0.340148
				0.254212
				0.257883
				0.490697
