# Supplementary material for: A signal capture and proofreading mechanism for the KDEL-receptor explains selectivity and dynamic range in ER retrieval
Source: eLife. 2021 Jun 17;10:e68380. doi: 10.7554/eLife.68380 (PMC8248988; doi:10.7554/eLife.68380)
Supplement: Figure 6—figure supplement 2—source data 1. [file elife-68380-fig6-figsupp2-data1.xlsx]

## Sheet: Sheet1
Figure 6 - Supplement 2
D50N N54K E117Q (K. lactis triple mutant)						D50N N54R E117N (S. pombe triple mutant)
No ligand	KDELsec (Hs.BiP CT WT)	DDELsec (Hs.BiP CT DDEL)	Kl.BiP CT WT (DDEL)	Kl.BiP CT D>K (KDEL)		No ligand	KDELsec (Hs.BiP CT WT)	ADELsec (Hs.BiP CT ADEL)	Sp.BiP CT WT (ADEL)	Sp.BiP CT A>K (KDEL)
0.247038	0.348485	0.189618	0.25026	0.496717		0.178542	0.230344	0.189072	0.119923	0.256498
0.405902	0.240997	0.182737	0.0804532	0.38362		0.307422	0.197981	0.12699	0.133148	0.191718
0.271657	0.227407	0.19335	0.239135	0.39451		0.231357	0.271815	0.209381	0.114824	0.191261
0.266333	0.107033	0.182976	0.10107	0.292129		0.362364	0.433252	0.0805475	0.110831	0.33661
0.385127	0.620247	0.0743276	0.139648	0.32684		0.410653	0.307815	0.113109	0.187024	0.576905
0.337821	0.442417	0.173046	0.0767113	0.269553		0.467465	0.188361	0.208785	0.1236	0.730521
0.381299	0.501531	0.0611211	0.174248	0.47841		0.442647	0.388472	0.251899	0.177423	0.454967
0.256035	0.441736	0.0624217	0.211718	0.317106		0.613265	0.389629	0.106321	0.17639	0.309303
0.274351	0.714057	0.169678	0.158322	0.461829		0.346915	0.279818	0.164247	0.252099	0.295848
0.181625	0.538946	0.183362	0.0599882	0.230405		0.434969	0.371873	0.220942	0.296219	0.20548
0.384635	0.716045	0.159691	0.191445	0.295267		0.390806	0.258071	0.223588	0.208676	0.2738
0.286838	0.296931	0.178331	0.167248	0.310176		0.427269	0.374958	0.127673	0.241318	0.200215
0.317427	0.285626	0.327756	0.164426	0.38978		0.42175	0.334478	0.127115	0.161919	0.279604
0.303041	0.29999	0.27435	0.193978	0.116611		0.440393	0.466695	0.220687	0.122984	0.272773
0.300988	0.171086	0.201148	0.138448	0.170008		0.403967	0.209674	0.134443	0.113299	0.469484
0.291157	0.537079	0.155686	0.152739	0.0805603		0.437041	0.344936	0.278106	0.110903	0.268277
0.358814	0.927273	0.301645	0.135937	0.107155		0.361476	0.249057	0.164068	0.140815	0.296893
0.244931	0.338233	0.19802	0.110332	0.219141		0.457861	0.324029	0.160477	0.106947	0.286699
0.377438	0.287461	0.332841	0.134919	0.119488		0.377721	0.278985	0.204612	0.0898677	0.129861
0.395992	0.322499	0.204222	0.15761	0.121598		0.363059	0.347932	0.158319	0.222492	0.374739
0.399437	0.419512	0.292247	0.129881	0.261304		0.313845	0.249764	0.18724	0.295689	0.30856
0.285893	0.389793	0.220515	0.151389	0.21281		0.47343	0.202666	0.0922287	0.183518	0.385947
0.342063	0.291148	0.217994	0.163689	0.206749		0.406216	0.29151	0.10598	0.301596	0.299714
0.397788	0.246847	0.242987	0.150323	0.294359		0.378227	0.279086	0.192877	0.134088	0.3411
0.250222	0.208867	0.192434	0.20612	0.111864		0.237596	0.229092	0.142596	0.197488	0.375757
0.220328	0.27796		0.0804683	0.193173		0.612961	0.38003	0.177657	0.172409	0.260938
0.348557	0.107706		0.15175	0.272522		0.538853	0.475273	0.102786	0.0590732	0.304744
0.491875	0.229624		0.157725	0.356874		0.352273	0.288476		0.134506	0.228469
0.503375	0.270366		0.112022	0.398781		0.558243	0.482994			0.315854
0.573035	0.293327		0.126267	0.188069		0.441015	0.401475			0.27479
	0.376954		0.123202	0.175874		0.325564	0.328317			0.250538
	0.181765		0.162677	0.690843		0.470292	0.368453			0.204087
	0.171285		0.194694	0.374686			0.296445			0.379319
	0.291318		0.194677	0.316822			0.270608			0.303108
	0.190881		0.181086	0.391666			0.308888			0.274163
	0.343263		0.272707	0.315193			0.272594			0.386435
	0.328935			0.317621			0.246817			0.322702
	0.444354			0.816069			0.341829
				0.847481			0.268548
							0.34979
