# Supplementary material for: A signal capture and proofreading mechanism for the KDEL-receptor explains selectivity and dynamic range in ER retrieval
Source: eLife. 2021 Jun 17;10:e68380. doi: 10.7554/eLife.68380 (PMC8248988; doi:10.7554/eLife.68380)
Supplement: Figure 6—source data 1. [file elife-68380-fig6-data1.xlsx]

## Sheet: Sheet1
Figure 6b
WT no ligand	WT +KDEL	WT +ADEL	WT +DDEL	D50N no ligand	D50N +KDEL	D50N +ADEL	D50N +DDEL	N54K no ligand	N54K +KDEL	N54K +ADEL	N54K +DDEL	D50N N54K no ligand	D50N N54K +KDEL	D50N N54K +ADEL	D50N N54K +DDEL	D50N E117Q no ligand	D50N E117Q +KDEL	D50N E117Q +ADEL	D50N E117Q +DDEL	N54K E117Q no ligand	N54K E117Q +KDEL	N54K E117Q +ADEL	N54K E117Q +DDEL	D50N N54K E117Q no ligand	D50N N54K E117Q +KDEL	D50N N54K E117Q +ADEL	D50N N54K E117Q +DDEL	D50 N54K E117Q W120A no ligand	D50 N54K E117Q W120A +KDEL	D50 N54K E117Q W120A +ADEL	D50 N54K E117Q W120A +DDEL
0.384227	0.236788	0.444391	0.434439	0.271931	0.199825	0.29774	0.279591	0.336915	0.255431	0.253466	0.24096	0.321276	0.206215	0.155887	0.179092	0.288958	0.333175	0.239611	0.164936	0.451478	0.161867	0.343463	0.238614	0.243319	0.343437	0.256648	0.275292	0.363277	0.445206	0.38276	0.338693
0.281291	0.134681	0.453235	0.304091	0.429937	0.237629	0.277945	0.224321	0.296805	0.170553	0.204187	0.206465	0.343343	0.112521	0.300439	0.150232	0.298663	0.267877	0.236682	0.17957	0.337303	0.222878	0.26729	0.127429	0.370489	0.374331	0.274519	0.210147	0.400462	0.36132	0.41016	0.390729
0.463013	0.180469	0.42456	0.337668	0.505603	0.295707	0.281658	0.352156	0.159654	0.165834	0.27762	0.432193	0.363075	0.092033	0.276111	0.121227	0.360886	0.255316	0.181744	0.277778	0.408405	0.229242	0.182277	0.102995	0.213316	0.443496	0.323642	0.223873	0.395212	0.289493	0.404298	0.313355
0.329414	0.291188	0.311382	0.200465	0.282787	0.175097	0.164368	0.380071	0.225288	0.160728	0.311944	0.213116	0.488983	0.240808	0.228327	0.0658168	0.399865	0.359433	0.204036	0.2041	0.361802	0.223767	0.344378	0.174719	0.340412	0.350325	0.304922	0.279167	0.521341	0.279449	0.373231	0.245675
0.300727	0.269608	0.366528	0.196565	0.521835	0.235423	0.336315	0.371543	0.209134	0.272137	0.397525	0.18713	0.328881	0.243825	0.228735	0.232023	0.312823	0.300989	0.197968	0.198059	0.341754	0.249364	0.134036	0.116265	0.392734	0.429616	0.260899	0.205745	0.645575	0.307032	0.330852	0.263656
0.339099	0.239056	0.442651	0.301926	0.411133	0.272797	0.270811	0.247829	0.325703	0.279456	0.234136	0.22061	0.353556	0.269729	0.296592	0.242244	0.360903	0.306402	0.200922	0.277997	0.26359	0.212762	0.273578	0.176286	0.481298	0.210955	0.302016	0.256406	0.473918	0.319617	0.383102	0.377491
0.25553	0.155124	0.456763	0.247625	0.35172	0.260415	0.469407	0.290234	0.227562	0.0756401	0.139985	0.305265	0.344585	0.150848	0.134328	0.186978	0.444974	0.440468	0.153168	0.145999	0.324806	0.179095	0.230892	0.0985845	0.184498	0.384339	0.346421	0.11904	0.376046	0.318578	0.35479	0.340876
0.31689	0.169818	0.377437	0.189383	0.304307	0.2546	0.329255	0.150024	0.155481	0.202817	0.286613	0.229008	0.356161	0.268677	0.231979	0.148604	0.371097	0.237162	0.131642	0.254022	0.299615	0.253017	0.27138	0.205284	0.424877	0.590263	0.270025	0.198735	0.418402	0.254083	0.302554	0.316247
0.285009	0.226863	0.383024	0.3111	0.278756	0.364667	0.369561	0.212622	0.31986	0.183869	0.190622	0.161756	0.19648	0.279258	0.221955	0.18218	0.248157	0.42037	0.234941	0.202098	0.283652	0.362141	0.154637	0.252669	0.676218	0.427093	0.385722	0.250183	0.396406	0.373571	0.228652	0.20362
0.334481	0.227692	0.386925	0.226193	0.369212	0.346888	0.339253	0.384642	0.278154	0.260837	0.267414	0.233445	0.24151	0.285592	0.247698	0.156557	0.369464	0.277812	0.238408	0.07657	0.35037	0.257616	0.188657	0.214074	0.569872	0.370102	0.218492	0.307598	0.479732	0.422551	0.315353	0.191459
0.28422	0.19117	0.459706	0.287182	0.264768	0.248666	0.338298	0.229857	0.264821	0.318346	0.137817	0.29095	0.324055	0.243738	0.21947	0.28915	0.301378	0.482713	0.252088	0.262801	0.154661	0.377071	0.187007	0.187351	0.429229	0.546813	0.397794	0.240654	0.429159	0.218436	0.302344	0.217757
0.290854	0.166909	0.56571	0.20561	0.438379	0.406385	0.317281	0.368054	0.417819	0.0614893	0.186489	0.360256	0.22448	0.210683	0.317657	0.248133	0.349345	0.266336	0.217071	0.203915	0.217336	0.17926	0.139352	0.214903	0.340393	0.338921	0.273381	0.209707	0.454383	0.434548	0.37584	0.260905
0.367211	0.221362	0.519606	0.339776	0.423094	0.269058	0.222308	0.375959	0.402054	0.189472	0.334853	0.452716	0.297017	0.215205	0.265745	0.158486	0.551301	0.409027	0.248872	0.208065	0.411592	0.320039	0.173603	0.238928	0.402383	0.376266	0.152698	0.306989	0.221506	0.445877	0.213415	0.196633
0.294425	0.109025	0.391174	0.357065	0.371269	0.189919	0.186064	0.402967	0.145967	0.120403	0.257106	0.233972	0.307945	0.248939	0.252586	0.19429	0.184762	0.339697	0.238617	0.277016	0.391472	0.476036	0.236795	0.256079	0.360684	0.368159	0.259427	0.0954838	0.299426	0.314531	0.232389	0.362793
0.311862	0.0737613	0.320095	0.58393	0.26475	0.418166	0.261666	0.331677	0.304505	0.155235	0.180093	0.304241	0.242812	0.259094	0.241469	0.198182	0.522761	0.145104	0.200618	0.195458	0.399642	0.432172	0.257267	0.0641784	0.388362	0.544411	0.250037	0.3204	0.232159	0.455649	0.203214	0.352692
0.2826	0.206376	0.36044	0.378791	0.241356	0.694224	0.298146	0.297019	0.191713	0.168902	0.328971	0.26754	0.36097	0.168971	0.326893	0.197289	0.391298	0.341271	0.248176	0.172921	0.425809	0.250904	0.258927	0.176268	0.641592	0.424767	0.206706	0.135394	0.368201	0.320166	0.284719	0.271549
0.361808	0.177928	0.400373	0.346437	0.349752	0.598448	0.306582	0.269029	0.219288	0.181764	0.212541	0.230637	0.32427	0.169755	0.356806	0.186076	0.429755	0.27411	0.218396	0.172432	0.418854	0.279415	0.184065	0.32576	0.469215	0.28078	0.312557	0.235006	0.356654	0.421295	0.19481	0.256071
0.343513	0.0941087	0.295951	0.352767	0.435111	0.168888	0.241828	0.24271	0.320319	0.223155	0.244852	0.176226	0.289986	0.269312	0.31131	0.279139	0.234531	0.304247	0.353116	0.177842	0.569119	0.440295	0.277229	0.294595	0.495671	0.388505	0.236308	0.233559	0.36686	0.361401	0.296365	0.327996
0.379325	0.214027	0.25577	0.346393	0.285527	0.362999	0.294171	0.38176	0.301991	0.200284	0.318022	0.370716	0.377275	0.176295	0.275011	0.239083	0.540833	0.368764	0.199236	0.20934	0.43578	0.261399	0.208505	0.286215	0.29474	0.473426	0.303664	0.304421	0.350446	0.376268	0.456117	0.385315
0.352343	0.144622	0.3622	0.24371	0.308227	0.314027	0.17331	0.277933	0.3914	0.255431	0.313771	0.387294	0.210539	0.434918	0.198565	0.244264	0.174662	0.245415	0.181324	0.180179	0.292264	0.259281	0.118861	0.320908	0.49108	0.354256	0.289918	0.286654	0.423074	0.338675	0.184436	0.34704
0.171527	0.145968	0.279519	0.342547	0.281686	0.372827	0.422123	0.3142	0.315189	0.170553	0.290912	0.228136	0.323378	0.277621	0.169529	0.170788	0.156038	0.344873	0.174423	0.158436	0.182323	0.461694	0.177225	0.347067	0.409662	0.374176	0.238855	0.324156	0.366694	0.287337	0.355222	0.269038
0.313473	0.202094	0.426525	0.278409	0.404626	0.221931	0.394025	0.48891	0.32415	0.165834	0.248674	0.421043	0.441804	0.20055	0.277573	0.119195	0.408167	0.345285	0.208045	0.25323	0.534686	0.335561	0.113992	0.205482	0.436703	0.470021	0.117933	0.110732	0.364855	0.25495	0.299776	0.318638
0.288376	0.195367	0.422668	0.32437	0.273815	0.313887	0.310838	0.301947	0.386136	0.160728	0.280668	0.459576	0.343294	0.179038	0.28157	0.146597	0.452856	0.23221	0.177375	0.19574	0.422537	0.371396	0.238405	0.323775	0.550566	0.541391	0.207672	0.218987	0.458518	0.265886	0.337765	0.333723
0.380222	0.215165	0.325183	0.181702	0.269662	0.398106	0.272728		0.230846	0.272137	0.251674	0.332117	0.380469	0.177945	0.112338	0.261532	0.518568	0.11888	0.15435	0.237343	0.383725	0.378903	0.208089	0.43207	0.541655	0.498175	0.288342	0.315918	0.218797	0.35835	0.313194	0.350568
0.271576	0.14593	0.282883	0.280869	0.343063	0.177457			0.208372	0.279456	0.239074	0.30881	0.336109	0.182461	0.197179	0.204731	0.373616	0.244578	0.14961	0.148194	0.404862	0.220779	0.259003	0.119333	0.447844	0.356269	0.264756	0.235757	0.308107	0.328171	0.357618	0.274812
0.520834	0.121302	0.366675	0.32441	0.303061	0.204982				0.0756401	0.135246	0.483969	0.293006	0.290549	0.33452	0.07896	0.444865	0.43312	0.232206	0.156682	0.486444	0.42578	0.224001	0.228747	0.633018	0.385616	0.236688	0.235969	0.178123	0.392481	0.27121	0.341607
0.439105	0.146712	0.47222	0.37691	0.436626					0.202817	0.306737	0.338902	0.32914	0.236748	0.28735	0.255577	0.349091	0.360639	0.374368	0.192854	0.375024	0.363009	0.183187	0.330686	0.430944	0.249333	0.306501	0.293997	0.195175	0.2568	0.454944	0.288217
0.236209	0.195721	0.200977	0.317834	0.32429					0.183869	0.344608	0.319606	0.493601	0.179446	0.212154	0.135975	0.324184	0.32994	0.182894	0.22851	0.290606	0.319393	0.111317	0.304821	0.348908	0.367344	0.354112	0.242565	0.415904	0.562941	0.395384	0.376834
0.278035	0.112751	0.332282	0.148846	0.432151					0.260837	0.273604	0.347598	0.299623	0.199883	0.335854	0.147926	0.455483	0.231315	0.274011	0.21525	0.404361	0.344551	0.225039	0.189335	0.372129	0.626005	0.224466	0.184379	0.320243	0.540157	0.174793	0.141391
0.344738	0.192774	0.320142	0.274288	0.283637					0.318346	0.31336	0.461471	0.374369	0.255234	0.192912	0.146784	0.375606	0.226633	0.230922	0.264717	0.342424	0.305942	0.182082	0.311835	0.562163	0.605472	0.284116	0.130533	0.198684	0.323319	0.276449	0.332433
0.312857	0.156066	0.312689	0.26964	0.429439					0.0614893	0.362894	0.38875	0.282074	0.37537	0.238903	0.0564542	0.313093	0.214186	0.190867	0.249053	0.232884	0.179099	0.300399	0.171984	0.397396	0.295147	0.269216	0.29296	0.301029	0.319072	0.259593	0.301099
0.365957	0.234615	0.371051	0.419258						0.189472	0.323106	0.410797			0.266111	0.206109	0.413861	0.294913	0.167089	0.146804	0.296773	0.305349	0.174979	0.179729	0.192265	0.384856	0.201114	0.218505	0.269655	0.33234	0.205019	0.366772
0.533537	0.220922	0.232388	0.363491						0.120403	0.218372	0.414371			0.163997	0.199861	0.512578	0.477357	0.253621	0.288713	0.2873	0.228147	0.17887	0.290584	0.481644	0.355519	0.282893	0.266789	0.30156	0.412432	0.211607	0.439236
0.457315	0.176207	0.369309	0.406175						0.155235	0.300108	0.448864			0.205791	0.240719	0.517793	0.46481	0.22171	0.190706	0.419767	0.393894	0.266537	0.202826	0.584018	0.503779	0.232421	0.15942	0.263488	0.289727	0.421279	0.317661
0.28947	0.143256	0.277521	0.65164						0.168902	0.333498	0.311872			0.319977		0.419811	0.576024	0.288216		0.240081	0.269605	0.272658	0.22336	0.557043	0.416528	0.272541	0.209289	0.284491	0.233667	0.186188	0.118891
0.251487	0.157397	0.39929	0.374968						0.181764	0.304041	0.427212			0.272487		0.284264		0.298639		0.165151	0.204377	0.175765	0.23945	0.482531	0.364472	0.241957	0.342566	0.279225		0.368162	0.263053
0.56926	0.168606	0.199505	0.592734						0.223155	0.322265	0.356687			0.262748				0.161308		0.37979	0.0902431	0.239929	0.239596	0.458018	0.435103	0.284012	0.179207	0.515604		0.281911	0.201367
0.352635	0.0992185	0.227824	0.166521						0.200284	0.380432	0.515821			0.164157				0.392635		0.314166	0.266662	0.214052		0.553925	0.457426	0.302716	0.240734	0.340136		0.442204	0.311703
0.413256	0.171897	0.248585	0.385057							0.343527	0.259583			0.261973							0.464123			0.371233		0.2674	0.233278	0.432442		0.310205	0.220048
0.516925	0.132543	0.34155	0.271815							0.201205	0.345921			0.178388										0.452224		0.218513	0.229485	0.248995		0.343588	0.184389
0.439246	0.0969072	0.240166	0.358768							0.286807	0.380901			0.181772										0.575544		0.183529	0.183237	0.212142		0.282968	0.202855
0.310865	0.174616	0.218045	0.463214							0.291336				0.26531										0.556917		0.181774	0.343163	0.201721		0.263492	0.208783
0.359166	0.133767	0.375047	0.32223							0.213219				0.227154												0.335797	0.273617	0.173974		0.347114	0.0988544
0.308597	0.173441	0.464525	0.633508							0.178572				0.308353												0.230191	0.208552	0.280497		0.29902	0.226
0.440566		0.340228	0.33221							0.188532				0.234888												0.155486		0.302532		0.324959	0.359078
0.341491		0.343922	0.396814																							0.147359		0.272477		0.348617	0.224168
0.271592		0.243269	0.335657																							0.209293		0.282578		0.498489	0.399863
0.23172		0.249542	0.306963																									0.319061		0.512052	0.279519
0.345309		0.371405	0.354029																									0.238228		0.474064	0.352855
0.261708		0.409659	0.235673																									0.353456		0.436541	0.2819
		0.332518	0.33268																									0.374305		0.434904	0.424745
		0.327714	0.377022																									0.319913			0.260332
		0.330305	0.390586																									0.272744			0.373664
		0.356211	0.41855																												0.216295
		0.358711	0.41565																												0.300768
			0.347317																												0.219679
			0.515501																												0.226923
			0.258326																												0.271902
			0.353594																												0.324777
			0.222864																												0.218836
			0.173396																												0.151879
			0.261258																												0.294717
			0.298812																												0.319543
			0.226928																												0.325687
			0.218175																												0.322763
			0.341915																												0.340247
			0.440763																												0.334282
			0.261501																												0.345362
			0.291036																												0.240092
																															0.194279
