# Supplementary material for: A signal capture and proofreading mechanism for the KDEL-receptor explains selectivity and dynamic range in ER retrieval
Source: eLife. 2021 Jun 17;10:e68380. doi: 10.7554/eLife.68380 (PMC8248988; doi:10.7554/eLife.68380)
Supplement: Figure 7—figure supplement 1—source data 1. [file elife-68380-fig7-figsupp1-data1.xlsx]

## Sheet: Sheet1
Figure 7g
Figure 7 - Supplement 1b
WT –Ligand	WT+KDEL	WT+RDEL	WT+HDEL	H12A –Ligand	H12A+KDEL	H12A+RDEL	H12A+HDEL	R169A –Ligand	R169A+KDEL	R169A+RDEL	R169A+HDEL	R169K –Ligand	R169K+KDEL	R169K+RDEL	R169K+HDEL
0.284408	0.256053	0.0666165	0.134388	0.363336	0.246467	0.283054	0.409299	0.286531	0.545399	0.57585	0.359194	0.439226	0.386183	0.130421	0.0802852
0.21616	0.211182	0.100558	0.130836	0.264588	0.341909	0.354985	0.345957	0.273907	0.361168	0.312189	0.426963	0.377562	0.366325	0.0703631	0.224774
0.247949	0.25195	0.127914	0.166948	0.281816	0.367968	0.325217	0.233492	0.13774	0.333186	0.204931	0.529958	0.212139	0.19902	0.208558	0.15073
0.192156	0.199022	0.107036	0.182055	0.224807	0.209223	0.372504	0.287434	0.211101	0.582069	0.220193	0.135929	0.201184	0.318103	0.147758	0.259976
0.293855	0.136514	0.151593	0.126504	0.343722	0.435663	0.271997	0.194192	0.368078	0.686475	0.183774	0.429943	0.1975	0.115954	0.102708	0.2838
0.156521	0.235575	0.112253	0.0632985	0.235274	0.367461	0.269237	0.276747	0.207055	0.647753	0.372566	0.135394	0.320853	0.304595	0.176435	0.0966947
0.339002	0.249037	0.237467	0.11683	0.276181	0.285798	0.309922	0.153317	0.479268	0.254707	0.252839	0.448645	0.342566	0.183297	0.110454	0.108842
0.368559	0.236238	0.119619	0.164311	0.236679	0.365214	0.18236	0.208788	0.23326	0.69042	0.502127	0.401289	0.411445	0.0850099	0.16423	0.122324
0.494764	0.234163	0.0838714	0.113142	0.316828	0.217352	0.39162	0.272345	0.356982	0.566346	0.365999	0.388348	0.31614	0.220961	0.087115	0.107093
0.430059	0.128518	0.211408	0.0996263	0.160412	0.232627	0.310647	0.173332	0.0894584	0.616807	0.268965	0.516457	0.482811	0.271051	0.177834	0.429344
0.240863	0.158642	0.108575	0.089004	0.40499	0.339502	0.396438	0.289728	0.216821	0.462714	0.166198	0.414604	0.401309	0.108884	0.134483	0.238389
0.393289	0.0830641	0.186859	0.107763	0.414954	0.2594	0.587495	0.242492	0.440948	0.449475	0.196885	0.334655	0.259096	0.267199	0.31527	0.142989
0.257173	0.171207	0.14928	0.0743349	0.442615	0.228329	0.462575	0.303795	0.378097	0.215786	0.155213	0.42202	0.347716	0.218337	0.271596	0.0876626
0.229677	0.151977	0.15591	0.135188	0.270266	0.375765	0.555881	0.329327	0.529445	0.376606	0.30595	0.297207	0.270309	0.186982	0.195731	0.129465
0.308448	0.0893792	0.191789	0.0852312	0.467375	0.417353	0.263347	0.324501	0.244692	0.579275	0.541332	0.376352	0.339799	0.300831	0.153054	0.289172
0.21875	0.193814	0.0826822	0.151176	0.323006	0.493471	0.726901	0.267436	0.291676	0.294471	0.309544	0.266241	0.390011	0.285411	0.1794	0.0878276
0.352919	0.165986	0.119147	0.123856	0.430907	0.331408	0.465344	0.225846	0.318741	0.534016	0.408686	0.232489	0.297351	0.139992	0.13894	0.168015
0.326748	0.0971785	0.217574	0.107256	0.487046	0.318156	0.376623	0.126864	0.352941	0.588391	0.519751	0.270976	0.316464	0.45574	0.216562	0.343761
0.238002	0.168899	0.149954	0.0601635	0.288651	0.332881	0.480074	0.441267	0.323711	0.386165	0.552833	0.226533	0.456617	0.388817	0.10238	0.149897
0.403163	0.144654	0.173545	0.156577	0.245279	0.219189	0.527349	0.366684	0.307053	0.442641	0.609776	0.267715	0.248631	0.134961	0.174838	0.0760736
0.339555	0.150039	0.209179	0.140653	0.242767	0.257834	0.486398	0.252891	0.223673	0.299319	0.641287	0.265854	0.30125	0.171683	0.24888	0.0923948
0.309965	0.202021	0.136202	0.132247	0.213119	0.365368	0.161535	0.271216	0.475072	0.386453	0.402781	0.52814	0.395498	0.123627	0.164495	0.094271
0.318587	0.167665	0.266276	0.0854344	0.296564	0.413057	0.32955	0.314556	0.665777	0.411492	0.569335	0.316973	0.373332	0.237312	0.338868	0.10299
0.28423	0.260196	0.196748	0.128195	0.239787	0.356952	0.358122	0.476089	0.305478	0.484854	0.329509	0.435439	0.294533	0.289991	0.544926	0.0742109
0.282322	0.309362	0.144427	0.171315	0.21794	0.347333	0.340799	0.249027	0.577713	0.244161	0.503322	0.263834	0.433756	0.214477	0.512986	0.085905
0.405112	0.123734	0.15741	0.130144	0.311488	0.392865	0.346395	0.0616557	0.374413	0.334766	0.546015	0.433236	0.42151	0.117301	0.330253	0.116498
0.343726	0.175714	0.129936	0.208227	0.337097	0.396323	0.433713	0.62544	0.265679	0.361031	0.407205	0.500018	0.277834	0.137097	0.709274	0.214739
0.486	0.0853815	0.0820666	0.139	0.18975	0.283988	0.428666	0.492097	0.545106	0.189141	0.544406	0.355853	0.463056	0.407431	0.346951
0.272568	0.152006	0.148807	0.146	0.303681	0.332287	0.444896	0.596593	0.333184	0.187898		0.501147	0.273179	0.417901	0.278065
0.336234	0.131452	0.171771	0.147	0.261779	0.24168	0.3514	0.397316	0.356274	0.267156		0.316485	0.199687	0.182931	0.36954
0.239756	0.139039	0.0811561	0.136	0.27982	0.241985		0.472515	0.293785	0.347798		0.586614	0.225605	0.170035	0.38282
0.216691	0.0717787	0.169413	0.105	0.229597	0.302273		0.433599	0.229475	0.511037		0.505651	0.155941	0.167681	0.173329
0.333272	0.140559	0.179539	0.147	0.222303			0.49235	0.663041	0.486163		0.184349	0.242823	0.185652	0.288806
0.45607	0.177484	0.145019	0.126	0.288394			0.493865	0.550718	0.402409		0.549577	0.181095		0.101534
0.401719	0.18752	0.132749	0.159	0.255164			0.463126	0.596549	0.320337		0.328103	0.324505		0.150425
0.238	0.274679	0.0944391	0.106				0.551954	0.610466				0.296614		0.205022
0.389	0.161195	0.208	0.138					0.338059				0.257977
0.357	0.226355	0.107	0.209					0.342588				0.387307
0.495	0.15812	0.203	0.064					0.371723
0.341	0.182632	0.197	0.172					0.40021
0.358	0.112	0.1	0.066					0.757987
0.251	0.097	0.089	0.078					0.483453
0.281	0.11	0.117	0.097					0.398225
0.317	0.094	0.163	0.064					0.464809
0.297	0.126	0.145	0.042					0.559424
0.261	0.107	0.172	0.137
0.286	0.098	0.213	0.064
0.575	0.081	0.173	0.121
0.279	0.154	0.133	0.053
0.312	0.102	0.072	0.162
0.607	0.046	0.094	0.119
0.348	0.088	0.218	0.068
0.267	0.085	0.103	0.083
0.22	0.122	0.135	0.169
0.212	0.255	0.151	0.131
0.263	0.129	0.145	0.119
0.312	0.164	0.126	0.166
0.258	0.167	0.11	0.074
0.131	0.083	0.093	0.092
0.327	0.157	0.151	0.113
0.23	0.127	0.159	0.054
0.228	0.077	0.201
0.218	0.057	0.093
0.311	0.116	0.063
0.372	0.116	0.164
0.337	0.124	0.087
0.312	0.143	0.07
0.247	0.077	0.134
0.413	0.079	0.074
0.211	0.098	0.077
0.254	0.169	0.109
0.363	0.091	0.094
0.258	0.276	0.109
0.329	0.145	0.186
0.266	0.123	0.083
0.264	0.079	0.188
0.218	0.139	0.088
0.249	0.149	0.12
0.137	0.124	0.108
0.159	0.173	0.08
0.228	0.126	0.168
0.226	0.097
0.285	0.168
0.232	0.079
0.208	0.121
0.346	0.105
0.412	0.062
0.327	0.15
0.245	0.058
0.277	0.138
0.329	0.114
0.23	0.067
0.151
0.301
0.424
0.172
0.225
0.577
0.354
0.341
1.043
0.211
0.271
0.373
0.29
0.231
0.405
